# Supplementary material for: Statistical Approach to Assess Chill and Heat Requirements of Olive Tree Based on Flowering Date and Temperatures Data: Towards Selection of Adapted Cultivars to Global Warming
Source: Preprints.org preprint supplement (doi:10.20944/preprints202210.0211.v2), 2022-11-29
Supplement: Supplementary file 3 [file supplementary]

Archive with 8 entries (8 files):
- agronomy-1997770-supplementary_OA_24-11-2022.pdf
- __MACOSX/._agronomy-1997770-supplementary_OA_24-11-2022.pdf
- Table S1.xlsx
- __MACOSX/._Table S1.xlsx
- Table S3.xlsx
- __MACOSX/._Table S3.xlsx
- Table S8.xlsx
- __MACOSX/._Table S8.xlsx
