# Supplementary material for: Statistical Approach to Assess Chill and Heat Requirements of Olive Tree Based on Flowering Date and Temperatures Data: Towards Selection of Adapted Cultivars to Global Warming
Source: Preprints.org preprint supplement (doi:10.20944/preprints202210.0211.v2), 2022-11-29
Supplement: Supplementary file 3 [file supplementary › Table S1.xlsx]

## Sheet: Table S1
Table S1. List of 331 studied olive cultivars, identified using 20 SSR markers and 11 endocarp traits. the number of trees, cultivar's origin of collection, accession code, accession name and cultivars for which PLS analysis was done are mentioned.
N° Order of Cultivar	Cultivar name	Number of trees	Cultivar's origin of collection	Accession code	Accession name	PLS analysis and thermal needs estimation
1	Aaleth	8	Algeria	MAR00422	Aaleth	Yes
				MAR00429	Abani
2	Abbadi	9	Syria	MAR00612	Abbadi Rassasi	Yes
				MAR00648	Abbadi Mour
				MAR00654	Abou Shawka Tadmori
				MAR00657	Abou Akfa
3	Abbadi Abou Gabra-610	2	Syria	MAR00610	Abbadi Abou Gabra	Yes
4	Abbadi Helo	2	Syria	MAR00656	Abbadi Helo	Yes
5	Abbadi Shalal	3	Syria	MAR00613	Abbadi Shalal	Yes
6	Abiad Min Omou	3	Syria	MAR00616	Abiad Min Omou	Yes
7	Abou Anaked	3	Syria	MAR00649	Abou Anaked	Yes
8	Abou Monkar	3	Egypt	MAR00497	Abou Monkar	Yes
9	Abunara	5	Italy	MAR0079	Abunara	Yes
				MAR0082	Biancolilla
10	Acebuchera	4	Spain	MAR00215	Acebuchera	No
11	Adkam	9	Syria	MAR00611	Adkam	Yes
				MAR00623	Souri
				MAR00659	Tebabs
12	Aggezi Akse	4	Egypt	MAR00481	Aggezi Akse	No
13	Aggezi Oshime	4	Egypt	MAR00482	Aggezi Oshime	Yes
14	Aggezi Shami	4	Egypt	MAR00480	Aggezi Shami	Yes
15	Aglandau	7	France	MAR00187	Aglandau	Yes
				MAR00188	Amellau
16	Agrarez	1	Algeria	MAR00436	Agrarez	No
17	Aguenaou	4	Algeria	MAR00423	Aguenaou	Yes
				MAR00433	Grosse du Hamma
18	Aharoun	1	Algeria	MAR00447	Aharoun	Yes
19	Ahia Ousbaa	1	Algeria	MAR00438	Ahia Ousbaa	Yes
20	Aîmel	2	Algeria	MAR00419	Aîmel	No
21	Aitana	2	Italy	MAR0078	Aitana	Yes
22	Akenane	1	Algeria	MAR00459	Akenane	No
23	Akerma	4	Algeria	MAR00418	Akerma	Yes
24	Alameño Blanco	4	Spain	MAR00216	Alameño Blanco	Yes
25	Alameño de Montilla	4	Spain	MAR00218	Alameño de Montilla	Yes
26	Albatro	4	Italy	MAR0030	Albatro	Yes
27	Allora	4	Italy	MAR0068	Allora	Yes
28	Amargoso	4	Spain	MAR00219	Amargoso	Yes
29	Americano	18	Italy	MAR0029	Americano	Yes
				MAR0038	Firenzuolo
				MAR0055	Pendolino
				MAR0077	Americano Itafir
				MAR0080	Americano
30	Arbequina	5	Spain	MAR00220	Arbequina	Yes
				MAR00296	Chemlali
31	Ascolana Tenera	4	Italy	MAR0076	Ascolana Tenera	Yes
32	Atounsi Setif	6	Algeria	MAR00451	Aghchren de Titest	Yes
				MAR00516	Atounsi Setif
33	Azeboudj de Khirane	4	Algeria	MAR00445	Azeboudj de Khirane	Yes
34	Azeradj	11	Algeria	MAR00431	Azeradj	Yes
				MAR00439	Bouchouk Soummam
				MAR00446	Aberkane
35	Azeradj Tamokra	3	Algeria	MAR00435	Aghchren d'el Ousseur	No
				MAR00448	Azeradj Tamokra
36	Azul	4	Spain	MAR00221	Azul	Yes
37	Baid El Hamam	8	Egypt	MAR00489	Wardan	Yes
				MAR00491	Baid El Hamam
38	Baladi	4	Egypt	MAR00487	Baladi	No
39	Barouni	2	Tunisia	MAR00410	Barouni	Yes
40	Bed Al Iguel	5	Syria	MAR00595	Bed Al Iguel	Yes
				MAR00655	Abou Kanani
41	Beladi	106	Lebanon	MAR00302	Agii Trymithias	Yes
				MAR00304	Anafotia
				MAR00305	Analiontas
				MAR00306	Analiontas
				MAR00307	Arediou
				MAR00308	Arediou
				MAR00309	Arediou
				MAR00310	Athalassa
				MAR00312	Evrychou
				MAR00313	Evrychou
				MAR00315	Kato Drys
				MAR00317	Kato Drys
				MAR00319	Klirou
				MAR00320	Klirou
				MAR00322	Lagoudera
				MAR00323	Lefkara
				MAR00324	Lefkara
				MAR00325	Lefkosia
				MAR00326	Lythrodontas
				MAR00327	Mazotos
				MAR00328	Meniko
				MAR00330	Paliometocho
				MAR00331	Peristerona
				MAR00572	Beladi
				MAR00573	Beladi
				MAR00575	Roumani Kana
				MAR00590	Beladi
				MAR00600	Sorani
				MAR00644	Bakuri
42	Beladi-577	3	Lebanon	MAR00577	Beladi	Yes
43	Beldi	4	Tunisia	MAR00288	Beldi	Yes
44	Berri Meslal-397	4	Morocco	MAR00397	Berri Meslal	Yes
45	Berri Meslal-532	4	Morocco	MAR00532	Berri Meslal	Yes
46	Besbessi	3	Tunisia	MAR00464	Besbessi	No
47	Bez El Anza	3	Egypt	MAR00495	Bez El Anza	Yes
48	Biancolilla-83	3	Italy	MAR0083	Biancolilla	No
49	Bical	4	Spain	MAR00333	Bical	Yes
50	Bissani-578	2	Lebanon	MAR00578	Bissani	No
51	Blanqueta	4	Spain	MAR00222	Blanqueta	Yes
52	Bolvino	4	Spain	MAR00223	Bolvino	Yes
53	Borriolenca	4	Spain	MAR00334	Borriolenca	Yes
54	Bosana	12	Italy	MAR00132	Olieddu	Yes
				MAR00143	Sassarese
				MAR00161	Palma
55	Bottone di gallo	2	Italy	MAR0084	Bottone di gallo	Yes
56	Bouchouika	4	Morocco	MAR00394	Bouchouika	Yes
57	Bouchouk Lafayette	2	Algeria	MAR00430	Bouchouk Lafayette	Yes
58	Bouteillan	4	France	MAR00189	Bouteillan	Yes
59	Brandofino	4	Italy	MAR0086	Brandofino	No
60	Buga	8	Croatia	MAR00398	Buga	Yes
				MAR00501	Plominka
				MAR00503	Crnica
61	Cairo 7	4	Egypt	MAR00493	Cairo 7	Yes
62	Calatina	3	Italy	MAR0087	Calatina	Yes
63	Callosina	4	Spain	MAR00391	Dahbia	No
64	Cañivano Negro	4	Spain	MAR00224	Cañivano Negro	Yes
65	Cariasina	4	Italy	MAR0091	Cariasina	Yes
66	Carolea	8	Italy	MAR005	Carolea	Yes
				MAR00100	Carolea
67	Carrasqueño de Elvas	4	Portugal	MAR00202	Carrasqueño de Elvas	Yes
68	Carrasqueño de Jumilla	4	Spain	MAR00226	Carrasqueño de Jumilla	Yes
69	Carrasquillo	4	Spain	MAR00335	Carrasquillo	Yes
70	Cassanese	4	Italy	MAR0014	Cassanese	Yes
71	Castricianella rapparina	3	Italy	MAR0097	Castricianella rapparina	Yes
72	Cavalieri	2	Italy	MAR0099	Cavalieri	Yes
73	Cayon	4	France	MAR00191	Cayon	Yes
74	Cerasuola	3	Italy	MAR0094	Cerasuola	Yes
75	Cerezuela	4	Spain	MAR00349	Morejona	Yes
76	Chalkidikis	4	Greece	MAR00168	Chalkidikis	Yes
77	Changlot Real	4	Spain	MAR00227	Changlot Real	No
78	Chemchali	4	Tunisia	MAR00293	Chemchali	Yes
79	Chemlal de Kabylie	3	Algeria	MAR00420	Chemlal de Kabylie	No
80	Chetoui	18	Tunisia	MAR0057	Punteruolo	Yes
				MAR00281	Chetoui
				MAR00408	Chaîbi Antha
				MAR00424	Blanquette de gastu
				MAR00425	Bouchoukra
				MAR00440	Blanquette de Guelma
81	Chorruo	8	Spain	MAR00229	Chorruo	Yes
				MAR00264	Pavo
82	Ciciarello	4	Italy	MAR002	Ciciarello	Yes
83	Cima di Melfi	2	Italy	MAR0092	Cima di Melfi	No
84	Cirujal	28	Spain	MAR0043	Gremignolo di Bolgheri	Yes
				MAR0044	Grossolana
				MAR00184	Throumbolia
				MAR00574	Beladi
				MAR00594	Ensasi
				MAR00619	Dan
				MAR00625	Antawi
				MAR00635	Khadrawi
85	Çobrancosa	4	Portugal	MAR00203	Çobrancosa	No
86	Confetto	31	Italy	MAR0089	Confetto	Yes
				MAR00116	Maiorca
				MAR00120	Manna
				MAR00124	Nera di Gonnos
				MAR00131	Nocellara Messinese
				MAR00149	Sivigliana da Mensa
				MAR00154	Tonda Di Cagliari
				MAR00182	Strogylolia
87	Coratina	6	Italy	MAR0020	Coratina	Yes
				MAR00101	Coratina
88	Corbella	4	Spain	MAR00230	Corbella	Yes
89	Cordovil de Serpa	4	Portugal	MAR00204	Cordovil de Serpa	Yes
90	Cornezuelo de Jaen	4	Spain	MAR00231	Cornezuelo de Jaen	Yes
91	Cornicabra	4	Spain	MAR00232	Cornicabra	Yes
92	Craputea	8	Italy	MAR0022	Leccione	Yes
				MAR0088	Craputea
93	Crastu	2	Italy	MAR0096	Crastu	Yes
94	Crnica-399	4	Slovenia	MAR00399	Crnica	Yes
95	Cucca	4	Italy	MAR0032	Cucca	Yes
96	Cuoricino	4	Italy	MAR0035	Cuoricino	Yes
97	Dhokar	7	Tunisia	MAR00413	Dhokar	Yes
				MAR00417	Dhokar Tataouine
98	Djlot Tadmori	4	Syria	MAR00617	Djlot Tadmori	Yes
99	Dolce di Rossano	4	Italy	MAR0011	Dolce di Rossano	Yes
100	Dressi	9	Tunisia	MAR00286	Dressi	Yes
				MAR00289	Deras
				MAR00411	R'khami
101	Dritta di Moscufa	2	Italy	MAR003	Dritta di Moscufo	Yes
102	Dulzal	4	Spain	MAR00233	Dulzal	Yes
103	El Lewa	4	Egypt	MAR00494	El Lewa	No
104	El Salam	4	Egypt	MAR00488	El Salam	Yes
105	Emilia	4	Italy	MAR0036	Emilia	Yes
106	Empeltre	3	Spain	MAR00234	Empeltre	Yes
107	Enagua de Arenas	4	Spain	MAR00336	Enagua de Arenas	Yes
108	Ensasi	2	Syria	MAR00599	Maarri	Yes
109	Escarabajuelo de Posadas	4	Spain	MAR00235	Escarabajuelo de Posadas	Yes
110	Escarabajuelo de Úbeda	4	Spain	MAR00236	Escarabajuelo de Úbeda	Yes
111	Farga	4	Spain	MAR00338	Farga	Yes
112	Fasolona	4	Italy	MAR00102	Fasolona	Yes
113	Ferkani	7	Algeria	MAR00416	Jemri bouchouka	Yes
				MAR00426	Ferkani
				MAR00460	Mekki
114	Fouji vert	8	Tunisia	MAR00291	Fouji vert	Yes
				MAR00292	Meski
115	Frantoio	55	Italy	MAR0024	Larcianese	Yes
				MAR0028	Arancino
				MAR0033	Correggiolo di pallesse
				MAR0039	Frantoio
				MAR0054	Puntino
				MAR0061	Razzo
				MAR0065	San Lazzaro
				MAR0075	Augellina
				MAR0095	Corsicana da olio
				MAR00103	Frantoio
				MAR00190	Cailletier
				MAR00533	Fakhfoukha
				MAR00583	Beladi
				MAR00586	Beladi
				MAR00587	Jlot
116	Fulla de Salze	4	Spain	MAR00339	Fulla de Salze	Yes
117	Galega Vulgar	4	Portugal	MAR00205	Galega Vulgar	Yes
118	Gemlik	10	TUR	MAR00608	Safrawi	Yes
				MAR00609	Kfar Zita
				MAR00633	Ayrouni
119	Gentile di chieti	3	Italy	MAR0015	Gentile di chieti	Yes
120	Gerboui	2	Tunisia	MAR00409	Marsaline	No
121	Gerboui-298	1	Tunisia	MAR00298	Gerboui	Yes
122	Giarfara	6	Italy	MAR00106	Giarfara	Yes
				MAR00282	Zarrazi
				MAR00412	Jemri
123	Giarraffa	10	Italy	MAR0085	Bella di Spagna	Yes
				MAR00105	Giarraffa
				MAR00163	Pizzo di corvo
124	Gordal de Granada	13	Spain	MAR00238	Gordalejo	Yes
				MAR00253	Manzanilla del Centro
				MAR00576	Beladi
				MAR00624	Stanboli
125	Gordal Sevillana	14	Spain	MAR0010	Santa Caterina	Yes
				MAR00108	Gordal Sevillana
				MAR00147	Santa Caterina
				MAR00536	Unkown-OMDZ
126	Grappolo	12	Italy	MAR0027	Leccio di Corno	Yes
				MAR0041	Grappolo
				MAR0047	Marzio
127	Gremigno di Fauglia	3	Italy	MAR00363	Gremigno di Fauglia	Yes
128	Grossa di Spagna	4	Italy	MAR0021	Grossa di Spagna	Yes
				MAR00107	Grossa di Spagna
129	Grossane-194	4	France	MAR00194	Grossanne	No
130	Habichuelero de Grazalema	4	Spain	MAR00239	Habichuelero de Grazalema	Yes
131	Hamed	3	Egypt	MAR00483	Hamed	Yes
132	Hamra	10	Algeria	MAR00434	Boukaïla	No
				MAR00443	Hamra
				MAR00517	Bouricha
133	Hemblasi-601	3	Syria	MAR00601	Hemblasi	Yes
134	Heraktane	3	Syria	MAR00647	Heraktane	Yes
135	Hojiblanca	4	Spain	MAR00240	Hojiblanca	Yes
136	Humaisi	4	Syria	MAR00593	Humaisi	Yes
137	Idleb	14	Syria	MAR00591	Ibleb	Yes
				MAR00605	Killin
				MAR00606	Djabali Kini
				MAR00607	Khello
138	Ifiri	3	Algeria	MAR00457	Ifiri	Yes
139	Intosso	4	Italy	MAR009	Intosso	Yes
140	Istarska crnica	4	Croatia	MAR00508	Istarska crnica	Yes
141	Itrana	32	Italy	MAR0017	Itrana	Yes
				MAR0090	Corsicana da mensa
				MAR00110	Itrana
				MAR00125	Nera di Oliena
				MAR00151	Terza grande
				MAR00152	Terza piccola
				MAR00153	Tonda di Villacidro
				MAR00159	Paschixedda
142	Jabaluna	4	Spain	MAR00241	Jabaluna	Yes
143	Jaropo	4	Spain	MAR00242	Jaropo	Yes
144	Jlot	14	Syria	MAR00321	Korakou	Yes
				MAR00602	Shami Modabl
				MAR00618	Djlot Shami
				MAR00638	Faruke
145	Kaissy	11	Syria	MAR00596	Sayfi	Yes
				MAR00604	Kaissy
				MAR00626	Alkkei
				MAR00650	Toffahi
146	Kalokerida	8	Greece	MAR00171	Kalokerida	Yes
				MAR00192	Olivière
147	Karamani	9	Syria	MAR00592	Ibleb	Yes
				MAR00636	Janude
				MAR00637	Janude
148	Karbuncela	4	Croatia	MAR00513	Karbuncela	No
149	Karme	2	Syria	MAR00640	Karme	No
150	Karolia	4	Greece	MAR00172	Karolia	Yes
151	Karydolia	4	Greece	MAR00173	Karydolia	Yes
152	Kato Drys	24	Cyprus	MAR00311	Evrychou	Yes
				MAR00314	Flasou
				MAR00316	Kato Drys
				MAR00318	Kiti
				MAR00329	Meniko
				MAR00332	Peristerona
153	Kerdi	2	Syria	MAR00597	Kerdi	Yes
154	Khadraya	1	Algeria	MAR00449	Khadraya	Yes
155	Khalkhali-629	4	Syria	MAR00629	Khalkhali	Yes
156	Khashabi-631	2	Syria	MAR00631	Khashabi	Yes
157	Khnfse	6	Syria	MAR00582	Beladi	Yes
				MAR00651	Khnfse
158	Khodieri	3	Syria	MAR00627	Khodieri	Yes
159	Kolybada	4	Greece	MAR00174	Kolybada	Yes
160	Koroneiki	7	Greece	MAR00175	Koroneiki	Yes
				MAR00301	Chemlali
161	Kossiem	3	Egypt	MAR00496	Kossiem	Yes
162	Kothreiki	2	Greece	MAR00176	Kothreiki	Yes
163	Koutsourelia	4	Greece	MAR00177	Koutsourelia	Yes
164	Lastovka	4	Croatia	MAR00506	Lastovka	Yes
165	Lastrino	4	Italy	MAR0023	Lastrino	No
166	Lazzero	4	Italy	MAR0025	Lazzero	Yes
167	Lazzero di prata	3	Italy	MAR00367	Lazzero di prata	Yes
168	Leccino	7	Italy	MAR0016	Leccino	Yes
				MAR0040	Gremignolo
169	Leccio Maremmano	7	Italy	MAR0026	Leccio Maremmano	Yes
				MAR00112	Leccio Maremmano
170	Lechin de Granada	8	Spain	MAR00169	Dafnelia	Yes
				MAR00340	Lechin de Granada
171	Lechín de Sevilla	4	Spain	MAR00243	Lechín de Sevilla	Yes
172	Lentisca-206	4	Portugal	MAR00206	Lentisca	Yes
173	Lentisca-244	4	Spain	MAR00244	Lentisca	No
174	Limoncillo	4	Spain	MAR00341	Limoncillo	Yes
175	Llorón de Atarfe	4	Spain	MAR00245	Llorón de Atarfe	Yes
176	Llumeta	3	Spain	MAR00343	Llumeta	Yes
177	Loaime	4	Spain	MAR00344	Loaime	Yes
178	Lucques	4	France	MAR00195	Lucques	Yes
179	Lumbardeska	12	Croatia	MAR00405	Samo Nova Vas	Yes
				MAR00500	Lumbardeska
				MAR00507	Oblica
180	Lumiaro	2	Italy	MAR00113	Lumiaro	Yes
181	Machorrón	4	Spain	MAR00247	Machorrón	No
182	Madonna dell 'impruneta	4	Italy	MAR0050	Madonna dell 'impruneta	Yes
183	Madural-208	4	Portugal	MAR00208	Madural	Yes
184	Mahati-615	2	Syria	MAR00615	Mahati	No
185	Maiatica di Ferrandina	13	Italy	MAR004	Maiatica di Ferrandina	Yes
				MAR00114	Maiatica di Ferrandina
				MAR00505	Žabarka
				MAR00512	Uljarica
186	Mançanilha Algarvia	4	Portugal	MAR00207	Mançanilha Algarvia	Yes
187	Mantonica	3	Italy	MAR00115	Mantonica	Yes
188	Manzanilla Cacereña	12	Spain	MAR00200	Azeitera	Yes
				MAR00209	Negrinha
				MAR00248	Manzanilla Cacereña
189	Manzanilla de Abla	4	Spain	MAR00249	Manzanilla de Abla	No
190	Manzanilla de Agua	4	Spain	MAR00345	Manzanilla de Agua	Yes
191	Manzanilla de Hellín	4	Spain	MAR00346	Manzanilla de Hellín	Yes
192	Manzanilla de Montefrío	4	Spain	MAR00250	Manzanilla de Montefrío	Yes
193	Manzanilla de Sevilla	11	Spain	MAR00228	Chesna	Yes
				MAR00251	Manzanilla de Sevilla
				MAR00290	Tounsi
194	Maraki	4	Egypt	MAR00485	Maraki	Yes
195	Maremmano	3	Italy	MAR00368	Maremmano	Yes
196	Masabi	4	Syria	MAR00585	Kelb El Ter	Yes
197	Mastoidis	4	Greece	MAR00178	Mastoidis	Yes
198	Maurino	16	Italy	MAR0042	Ginestrino	Yes
				MAR0053	Maurino
				MAR00118	Maurino
				MAR00407	Boise
199	Mavreya	4	Greece	MAR00179	Mavreya	Yes
200	Mawi	8	Syria	MAR00620	Mawi	Yes
				MAR00622	Masabi
201	Meloky	3	Egypt	MAR00490	Meloky	Yes
202	Meslala	8	Morocco	MAR00535	Meslala	Yes
				MAR00564	Unkown-ZZ 6
203	Mesyaf-641	3	Syria	MAR00641	Mesyaf	Yes
204	Mesyaf-662	2	Syria	MAR00662	Mesyaf	No
205	Mignolo	4	Italy	MAR0049	Mignolo	Yes
206	Mignolo Cerretano	7	Italy	MAR0046	Mignolo Cerretano	Yes
				MAR00365	Gremigna Tonde
207	Minekiri	7	Syria	MAR00634	Minekiri	Yes
				MAR00658	Tebabs
208	Mohazam Abou Satl	7	Syria	MAR00614	Mohazam Abou Satl	Yes
				MAR00630	Doebli
				MAR00653	Shami
209	Mollar de Cieza	8	Spain	MAR00347	Meloncillo	Yes
				MAR00348	Mollar de Cieza
210	Moraiolo	28	Italy	MAR0037	Filare	Yes
				MAR0051	Morcaio
				MAR0052	Moraiolo
				MAR0066	Tondello
				MAR00119	Moraiolo
				MAR00193	Cayet roux
				MAR00303	Alethriko
211	Morchiaio	23	Italy	MAR0048	Morchiaio	Yes
				MAR0070	Giogolino
				MAR00117	Morchiaio
				MAR00400	Drobnica
				MAR00504	Drobnica
				MAR00511	Mezanica
				MAR00514	Sitnica
212	Morchione	4	Italy	MAR0067	Morchione	Yes
213	Morcone	4	Italy	MAR0045	Morcone	No
214	Morello a punta	4	Italy	MAR00372	Morello a punta	Yes
215	Moresca	8	Italy	MAR0093	Olivo di Castiglione	Yes
				MAR00121	Moresca
				MAR00122	Nerba Catanese
216	Morisca	8	Spain	MAR00212	Santulhana	Yes
				MAR00254	Morisca
217	Morona	4	Spain	MAR00246	Llorón de Ronda	Yes
218	Morrut	6	Spain	MAR00252	Manzanilla de Tortosa	Yes
				MAR00350	Morrut
219	Mortellino	3	Italy	MAR00373	Mortellino	Yes
220	Nasitana Frutto Grosso	4	Italy	MAR00128	Nasitana Frutto Grosso	Yes
221	Neb J'mel-452	3	Algeria	MAR00452	Neb Jmel	Yes
222	Neb Jmel-283	4	Tunisia	MAR00283	Neb Jmel	Yes
223	Negral de Sabiñan-255	3	Spain	MAR00255	Negral de Sabiñan	Yes
224	Negrillo de Arjona	4	Spain	MAR00256	Negrillo de Arjona	Yes
225	Negrillo de Estepa	4	Spain	MAR00351	Negrillo de Estepa	No
226	Negrillo de Iznalloz	4	Spain	MAR00352	Negrillo de Iznalloz	Yes
227	Negrillo Redondo	4	Spain	MAR00257	Negrillo Redondo	Yes
228	Negrita	4	Portugal	MAR00210	Negrita	Yes
229	Nerba	4	Italy	MAR00123	Nerba	Yes
230	Nevado Azul	4	Spain	MAR00354	Nevado Azul	Yes
231	Nevado Basto	4	Spain	MAR00225	Carrasqueño de Alcaudete	Yes
232	Nevado Rizado	4	Spain	MAR00355	Nevado Rizado	Yes
233	Nocellara del Belice	16	Italy	MAR0013	Nocellara del Belice	Yes
				MAR0019	Nocellara Messinese
				MAR00129	Nocellara del Belice
				MAR00403	Misnica
234	Nocellara Etnea	4	Italy	MAR00126	Nocellara Etnea	Yes
				MAR00127	Nocellara Etnea
235	Nociara	6	Italy	MAR008	Nociara	Yes
				MAR00130	Nociara
236	Ocal	19	Spain	MAR00258	Ocal	Yes
				MAR00277	Verdal de Alhama
				MAR00395	Bouchouk Laghlid
				MAR00396	Bouchouk Rkike
				MAR00558	Unkown-Zms 1
237	Ogliarola del Bradano	3	Italy	MAR00134	Ogliarola del Bradano	Yes
238	Ogliarola del Vulture	8	Italy	MAR007	Carboncella	Yes
				MAR00133	Ogliarola del Vulture
239	Ojo de Liebre	4	Spain	MAR00259	Ojo de Liebre	Yes
240	Olivastra di Montalcino	10	Italy	MAR0074	Olivastra Seggianese	Yes
				MAR00375	Olivastra di Montalcino
				MAR00509	Oleaster
241	Olivastra di Populonia	3	Italy	MAR0072	Olivastra di Populonia	Yes
242	Olivo de Mancha Real	4	Spain	MAR00260	Olivo de Mancha Real	Yes
243	Olivo del Mulino	4	Italy	MAR00165	Olivo del Mulino	Yes
244	Olivo di Casavecchia	4	Italy	MAR0034	Olivo di Casavecchia	Yes
245	Olivo di Mandanici	2	Italy	MAR00136	Olivo di Mandanici	No
246	Olivo di San Lorenzo	4	Italy	MAR0069	Olivo di San Lorenzo	Yes
247	Ornellaia	8	Italy	MAR0073	Ornellaia	Yes
				MAR00148	San Francesco
248	Ottobratica	4	Italy	MAR001	Ottobratica	Yes
249	Palomar	4	Spain	MAR00262	Palomar	Yes
250	Passulunara	4	Italy	MAR0098	Castriciana	Yes
				MAR00158	Passulunara
251	Patronet	3	Spain	MAR00263	Patronet	Yes
252	Pendolino-162	2	Italy	MAR00162	Pendolino	Yes
253	Piangente	4	Italy	MAR0058	Piangente	Yes
254	Picholine	9	France	MAR00156	Picholine	Yes
				MAR00196	Picholine
				MAR00581	Abou Choki
255	Picholine Marocaine	88	Morocco	MAR00217	Alameño de Marchena	Yes
				MAR00387	Haouzia
				MAR00389	Haouzia
				MAR00390	Menara
				MAR00392	Zitoune kellal
				MAR00442	Limli
				MAR00456	Sigoise
				MAR00498	Sinawy
				MAR00523	Aghenfas
				MAR00531	Aghenfas
				MAR00534	Hamrani
				MAR00540	Picholine Marocaine
				MAR00541	Picholine Marocaine
				MAR00549	ZDH1
				MAR00550	ZDH2
				MAR00551	ZDH3
				MAR00552	ZDH4
				MAR00554	ZDH6
				MAR00555	ZDH7
				MAR00556	Zitoune DK
256	Pico Limón de Grazalema	4	Spain	MAR00265	Pico Limón de Grazalema	Yes
257	Picual	8	Spain	MAR00261	Olivo Macho de Santisteban Pto	Yes
				MAR00267	Picual
258	Picudo	4	Spain	MAR00356	Picudo	Yes
259	Pidicuddara	3	Italy	MAR00157	Pidicuddara	Yes
260	Pikrolia	4	Greece	MAR00180	Pikrolia	Yes
261	Plementa Bjelica	10	Croatia	MAR0081	Bianchera	Yes
				MAR00401	Istarska Bjelica
				MAR00402	Istarska Bjelica
262	Puntoza	4	Croatia	MAR00499	Puntoza	Yes
263	Rachati-181	4	Greece	MAR00181	Rachati	Yes
264	Racimal	4	Spain	MAR00268	Racimal	Yes
265	Rapasayo	4	Spain	MAR00357	Rapasayo	Yes
266	Ravece	8	Italy	MAR00139	Rotondella	Yes
				MAR00140	Ravece
267	Razzaio	4	Italy	MAR0063	Razzaio	Yes
268	Rechino	4	Spain	MAR00269	Rechino	No
269	Redondal	4	Portugal	MAR00211	Redondal	Yes
270	Remmani	7	Lebanon	MAR00588	Remmani	Yes
				MAR00589	Beladi
				MAR00628	Dermlali
271	Ronde de la Ménara	3	Morocco	MAR00543	Ronde de la Ménara	Yes
272	Ronde de Miliana	8	Algeria	MAR00428	Ronde de Miliana	Yes
				MAR00453	Longue de Miliana
273	Rossellino	16	Italy	MAR0031	Ciliegino	Yes
				MAR0056	Pesciatino
				MAR0059	Rosino
				MAR0060	Rossellino
274	Rossellino Cerretano	4	Italy	MAR00379	Rossellino Cerretano	Yes
275	Rossello	4	Italy	MAR0062	Rossello	Yes
276	Rougette de Mitidja	4	Algeria	MAR00444	Rougette de Mitidja	Yes
277	Royal de Cazorla	4	Spain	MAR00270	Royal de Cazorla	Yes
278	Sabatera	4	Spain	MAR00271	Sabatera	Yes
279	Salicino	4	Italy	MAR0071	Salicino	No
280	Salonenque	3	France	MAR00197	Salonenque	Yes
281	Samo	4	Slovenia	MAR00404	Samo	Yes
282	San Francesco	4	Italy	MAR0064	San Francesco	Yes
283	Sant Agostino	12	Italy	MAR006	Sant Agostino	Yes
				MAR00146	Sant Agostino
				MAR00167	Amphisis
284	Santa Martinenga	4	Italy	MAR00145	Santa Martinenga	Yes
285	Sayali	3	Tunisia	MAR00287	Sayali	Yes
286	Sebhawy	4	Egypt	MAR00492	Sebhawy	Yes
287	Sevillano de Jumilla	4	Spain	MAR00272	Sevillano de Jumilla	Yes
288	Sevillenca	4	Spain	MAR00358	Sevillenca	Yes
289	Simjaca	4	Croatia	MAR00502	Simjaca	Yes
290	Sinopolese	1	Italy	MAR0018	Sinopolese	No
291	Sivigliana da Olio	4	Italy	MAR00150	Sivigliana da Olio	Yes
292	Souidi	1	Algeria	MAR00458	Souidi	Yes
293	Štorta	4	Slovenia	MAR00406	Štorta	Yes
294	Sukkare	1	Syria	MAR00663	Sukkare	No
295	Tabelout	7	Algeria	MAR00432	Takesrit	Yes
				MAR00437	Tabelout
296	Tanche-74	4	France	MAR00198	Tanche	Yes
297	Tarabelsi	4	Syria	MAR00632	Tarabelsi	Yes
298	Tebabs	6	Syria	MAR00598	Karamani	Yes
				MAR00661	Tebabs
299	Teffah	2	Algeria	MAR00427	Teffah	Yes
300	Tempranillo de Yeste-274	3	Spain	MAR00274	Tempranillo de Yeste	Yes
301	Toffahi-486	4	Egypt	MAR00486	Toffahi	No
302	Toffahi-621	4	Syria	MAR00621	Toffahi	Yes
303	Tonda Iblea	3	Italy	MAR0012	Tonda Iblea	Yes
304	Tounsi-461	1	Tunisia	MAR00461	Tounsi	No
305	Trillo	4	Italy	MAR00382	Trillo	Yes
306	Unkown-OT2-537	3	Morocco	MAR00537	Unkown-OT2	No
307	Unkown-OZ1-538	6	Morocco	MAR00538	Unkown-OZ1	Yes
				MAR00539	Unkown-OZ2
308	Unkown-VS1-544	3	Morocco	MAR00544	Unkown-VS1	Yes
309	Unkown-VS2-545	9	Morocco	MAR00545	Unkown-VS2	Yes
				MAR00546	Unkown-VS3
				MAR00548	Unkown-VS6
310	Unkown-VS5-547	4	Morocco	MAR00547	Unkown-VS5	Yes
311	Uovo di Piccione	4	Italy	MAR00141	Uovo di Piccione	No
312	Vaddarica	3	Italy	MAR00164	Vaddarica	Yes
313	Varudo	4	Spain	MAR00273	Tempranillo de Lucena	No
314	Varudo-275	4	Spain	MAR00275	Varudo	No
315	Vasilikada	4	Greece	MAR00186	Vasilikada	Yes
316	Velika Lastovka	4	Croatia	MAR00515	Velika Lastovka	Yes
317	Vera	4	Spain	MAR00276	Vera	No
318	Verdala	4	Spain	MAR00278	Verdala	Yes
319	Verdale	4	France	MAR00199	Verdale	Yes
320	Verdial de Badajoz	8	Spain	MAR00266	Picual de Hoja Clara	Yes
				MAR00342	Llorón de Iznalloz
321	Verdial de Huévar	4	Spain	MAR00213	Verdial Alentejana	Yes
322	Verdial transmontana	4	Portugal	MAR00214	Verdial transmontana	Yes
323	Verdiell	4	Spain	MAR00279	Verdiell	No
324	Villalonga	4	Spain	MAR00201	Branquita de Elvas	Yes
325	Wateken	2	Egypt	MAR00484	Wateken	No
326	Zael Al Muhra	10	Syria	MAR00639	Zael Al Muhra	Yes
				MAR00643	Delle
				MAR00645	Munkar Kak
327	Zaity	6	Syria	MAR00603	Zaity	Yes
				MAR00646	Khuokhe
328	Zalmati-299	4	Tunisia	MAR00299	Zalmati	Yes
329	Zarza	4	Spain	MAR00280	Zarza	Yes
330	Zeboudj boudoudane	3	Algeria	MAR00441	Zeboudj boudoudane	Yes
331	Zeletni	1	Algeria	MAR00421	Zeletni	Yes
