# Supplementary material for: Statistical Approach to Assess Chill and Heat Requirements of Olive Tree Based on Flowering Date and Temperatures Data: Towards Selection of Adapted Cultivars to Global Warming
Source: Preprints.org preprint supplement (doi:10.20944/preprints202210.0211.v2), 2022-11-29
Supplement: Supplementary file 3 [file supplementary › Table S3.xlsx]

## Sheet: Table S3
Table S3. Analysis of variance and Tukey grouping of full flowering dates of analyzed olive cultivars of the WOGBM. Means with the same letters are not significantly different. Alpha is 0.05
Sum of squares	Mean square	F Value	Pr > F	Cultivar	Mean Full flowering date	Tukey Grouping												Standard deviation	N.of.observations	Min	Max	Q25	Q50	Q75
38451	117	23135	<.0001 ***	Ogliarola del Bradano	132.2	a											F1	12.74	10	110	145	121	138	143.25
				Lastrino	131.64	a	b										F2	10.54	14	121	145	121	132.5	143.25
				Chemlal de Kabilye	130.5	a	b	c									F3	7.89	4	119	137	129.5	133	134
				Gremigno di Fauglia	130.22	a	b	c									F3	12.16	9	118	145	119	131	145
				Morello a punta	130	a	b	c									F3	9.58	13	116	145	121	131	138
				Olivo di Mandanici	129	a	b	c	d								F4	9.07	6	118	138	121.25	131	136.25
				Rossellino Cerretano	128.92	a	b	c	d								F4	8.57	14	110	138	125	131	137
				Simjaca	128.62	a	b	c	d								F4	9.05	8	117	137	118.75	132	137
				Mesyaf-641	128.33	a	b	c	d								F4	6.7	9	117	137	125	132	133
				Biancolilla-83	128.25	a	b	c	d	e							F5	8.44	8	120	138	120	126	138
				Picudo	128.22	a	b	c	d	e							F5	7.54	9	121	136	121	126	136
				Olivastra di Populonia	128	a	b	c	d	e							F5	13.19	12	110	145	119.75	127.5	136.75
				Razzaio	127.8		b	c	d	e							F6	9.63	15	113	145	119	131	136
				Gemlik	127.73			c	d	e							F7	10.18	26	108	144	121	132	137
				Abbadi	127.72			c	d	e							F7	12.59	18	108	147	118.25	132	135.75
				Tabelout	127.70			c	d	e							F7	9	17	117	144	119	126	137
				Tounsi-461	127.66			c	d	e	f						F8	12.09	3	114	137	123	132	134.5
				Karamani	127.52			c	d	e	f						F8	11.05	25	108	144	118	132	137
				Mahati-615	127.4			c	d	e	f						F8	7.02	5	121	137	121	126	132
				Ottobratica	127.33			c	d	e	f						F8	9.37	15	113	138	121	131	136
				Gentile di chieti	127.18			c	d	e	f						F8	10.51	11	107	138	121	131	136
				Morcone	127.16			c	d	e	f						F8	8.77	18	116	138	119.5	121	137
				Morchione	127.07			c	d	e	f						F8	10.27	14	107	138	120	131	137
				Akenane	127			c	d	e	f	g					F9	14.14	2	117	137	122	127	132
				Madonna dell 'impruneta	127			c	d	e	f	g					F9	11.4	18	110	138	121	125	138
				Olivo di San Lorenzo	127			c	d	e	f	g					F9	9.59	14	113	138	119	131	136.25
				Verdiell	127			c	d	e	f	g					F9	6.57	12	119	136	119	131	132
				Dolce di Rossano	126.81			c	d	e	f	g					F9	8.13	11	118	138	121	121	134
				Ahia Ousbaa	126.66			c	d	e	f	g					F9	9.6	3	118	137	121.5	125	131
				Aitana	126.57			c	d	e	f	g					F9	11.97	7	111	145	119	123	134.5
				Aggezi Oshime	126.37			c	d	e	f	g					F9	8.6	8	114	137	120.75	126	133.25
				Lazzero di prata	126.30			c	d	e	f	g					F9	13.46	13	110	145	119	121	134
				Cassanese	126.16			c	d	e	f	g					F9	10.51	12	111	138	119	125	138
				Ronde de Miliana	126.15			c	d	e	f	g					F9	8.88	19	108	137	122	126	133
				Brandofino	126.14			c	d	e	f	g					F9	9.2	7	119	138	119	119	134.5
				Dritta di Moscufa	126.12			c	d	e	f	g					F9	12.72	8	110	145	118.25	126	134.75
				Pendolino-162	126.12			c	d	e	f	g					F9	10.57	8	110	138	119.75	126	135
				Tarabelsi	126.12			c	d	e	f	g					F9	11.53	8	108	137	117	129	137
				Meloky	126.1			c	d	e	f	g					F9	11.21	10	108	137	120.5	129	135.75
				Limoncillo	126.07			c	d	e	f	g					F9	8.47	13	107	136	121	126	136
				Gerboui	126			c	d	e	f	g					F9	6.92	3	118	130	124	130	130
				Lechin de Granada	125.92			c	d	e	f	g					F9	7.7	26	107	136	121	126	132
				Allora	125.8			c	d	e	f	g					F9	10.72	10	110	148	119	125	131
				Carrasquillo	125.8			c	d	e	f	g					F9	8.85	10	118	136	118	121	136
				Kossiem	125.8			c	d	e	f	g					F9	7.25	5	118	133	119	126	133
				Olivastra di Montalcino	125.75			c	d	e	f	g					F9	11.32	20	107	138	118.75	131	137
				Mortellino	125.7			c	d	e	f	g					F9	10.65	10	111	138	119	125	136.25
				Pikrolia	125.68			c	d	e	f	g					F9	13.04	16	107	146	117.5	122	132.25
				Çobrancosa	125.66			c	d	e	f	g					F9	5.54	12	119	132	119	126	132
				Kothreiki	125.66			c	d	e	f	g					F9	8.31	6	118	136	119.25	123	132.75
				Galega Vulgar	125.61			c	d	e	f	g					F9	6.19	13	118	132	119	126	132
				Negrillo de Arjona	125.57			c	d	e	f	g					F9	11.34	14	110	139	118.75	121	137.75
				Morchiaio	125.55			c	d	e	f	g					F9	10.44	72	107	145	117.75	121	134
				Lentisca-244	125.53			c	d	e	f	g					F9	8.27	15	116	136	118.5	119	133.5
				Heraktane	125.5			c	d	e	f	g					F9	12.84	6	110	137	115	127.5	137
				Negral de Sabiñan-255	125.5			c	d	e	f	g					F9	9.89	10	112	136	115.25	128.5	134.75
				Patronet	125.5			c	d	e	f	g					F9	7.42	10	119	136	119.5	123	132.75
				Kolybada	125.46			c	d	e	f	g					F9	8.45	13	107	132	118	131	132
				Moraiolo	125.46			c	d	e	f	g					F9	9.24	102	107	145	119	121	134
				Maurino	125.40			c	d	e	f	g					F9	8.7	42	112	145	121	121	131
				Grossane-194	125.4			c	d	e	f	g					F9	5.37	10	119	132	120	126	130.5
				Negrillo de Iznalloz	125.38			c	d	e	f	g					F9	8.59	13	112	136	121	126	136
				Khnfse	125.37			c	d	e	f	g					F9	11.68	16	110	144	117	122	137
				Minekiri	125.36			c	d	e	f	g					F9	13.98	11	108	150	113	132	132
				Emilia	125.26			c	d	e	f	g					F9	9.75	19	110	138	121	121	134
				Khodieri	125.2			c	d	e	f	g					F9	9.82	10	108	137	117.75	129	132.75
				Plementa Bjelica	125.2			c	d	e	f	g					F9	11.23	25	108	145	118	121	133
				Carrasqueño de Elvas	125.16			c	d	e	f	g					F9	6.36	12	116	132	119	126	131.25
				Cerezuela	125.16			c	d	e	f	g					F9	9.32	18	107	139	121	121	131
				Tanche-74	125.16			c	d	e	f	g					F9	6.89	12	118	136	118	123	132
				Olivo de Mancha Real	125.09			c	d	e	f	g					F9	8.39	11	112	136	119	121	132
				Hamra	125.04			c	d	e	f	g					F9	9.17	23	110	137	117.5	119	133
				Aguenaou	125			c	d	e	f	g					F9	8.09	10	110	133	119	126	132.75
				Ascolana Tenera	125			c	d	e	f	g					F9	9.92	12	107	138	121	121	134
				Baladi	125			c	d	e	f	g					F9	7.34	7	118	137	120	122	129
				Barouni	125			c	d	e	f	g					F9	9.38	4	115	133	118	126	133
				Cirujal	125			c	d	e	f	g					F9	10.52	80	107	148	118	126	132
				Ogliarola del Vulture	125			c	d	e	f	g					F9	11.33	38	107	145	118	121	131
				Remmani	125			c	d	e	f	g					F9	10.89	11	108	144	118	118	132
				Gordal de Granada	124.97			c	d	e	f	g					F9	8.30	37	108	144	119	126	132
				Rossellino	124.96			c	d	e	f	g					F9	11.29	60	107	145	114	124.5	134
				Fasolona	124.92			c	d	e	f	g					F9	9.20	13	116	138	118	121	138
				Racimal	124.91			c	d	e	f	g					F9	8.56	12	116	136	119	120	136
				Mavreya	124.85			c	d	e	f	g					F9	9.49	14	109	136	118	127	131.75
				Rachati-181	124.85			c	d	e	f	g					F9	11.21	14	112	146	116.5	118	131
				Leccio Maremmano	124.83			c	d	e	f	g					F9	10.63	31	107	138	120	121	134
				Castricianella rapparina	124.83			c	d	e	f	g					F9	11.09	12	107	138	118.25	125.5	132.75
				Besbessi	124.8			c	d	e	f	g					F9	7.661	5	118	133	118	122	133
				Atounsi Setif	124.76			c	d	e	f	g					F9	7.949	13	108	133	122	122	133
				Machorrón	124.76			c	d	e	f	g					F9	9.029	13	114	136	114	126	132
				Piangente	124.73			c	d	e	f	g					F9	10.73	19	110	145	116	119	134
				Azeradj	124.66				d	e	f	g					F10	7.620	27	108	133	119	126	133
				Negrillo Redondo	124.64				d	e	f	g					F10	9.483	14	112	136	119	125	131.75
				Giarfara	124.63				d	e	f	g					F10	10.46	19	107	138	118	126	134.5
				Habichuelero de Grazalema	124.61				d	e	f	g					F10	6.589	13	118	136	118	123	132
				Mohazam Abou Satl	124.58				d	e	f	g					F10	10.55	17	114	137	114	118	137
				Djlot Tadmori	124.5				d	e	f	g					F10	9.411	8	108	137	120	123	132.25
				Grappolo	124.5				d	e	f	g					F10	8.052	42	107	138	121	121	134
				Karme	124.5				d	e	f	g	h				F11	17.67	2	112	137	118.25	124.5	130.75
				Passulunara	124.45				d	e	f	g	h				F11	11.63	11	107	138	118.5	121	134.5
				Akerma	124.42				d	e	f	g	h				F11	8.263	7	114	137	119.5	122	129.5
				Istarska crnica	124.42				d	e	f	g	h				F11	10.11	7	108	137	118.5	125	132
				Escarabajuelo de Posadas	124.4				d	e	f	g	h				F11	8.707	15	111	139	118	121	131
				Blanqueta	124.36				d	e	f	g	h				F11	10.02	19	107	136	121	121	134
				Crnica-399	124.33				d	e	f	g	h				F11	7.211	9	117	133	117	126	132
				Itrana	124.31					e	f	g	h				F12	10.37	91	107	145	119	121	131
				Verdial de Huévar	124.31					e	f	g	h				F12	9.917	16	111	139	117.5	125	131.25
				San Francesco	124.30					e	f	g	h				F12	10.08	13	114	138	114	126	131
				Adkam	124.28					e	f	g	h				F12	13.79	28	108	144	108	118	137
				Ravece	124.24					e	f	g	h				F12	9.402	29	107	138	119	123	134
				Mignolo Cerretano	124.21					e	f	g	h				F12	9.949	23	111	138	119	121	134.5
				Zeboudj boudoudane	124.2					e	f	g	h				F12	9.840	10	108	137	119	125	132
				Chetoui	124.18					e	f	g	h				F12	9.015	33	111	138	117	121	132
				Rougette de Mitidja	124.18					e	f	g	h				F12	9.282	11	110	137	117	126	133
				Americano	124.16						f	g	h				F13	11.42	59	107	145	114	121	134
				Cordovil de Serpa	124.15						f	g	h				F13	7.755	13	114	136	119	123	132
				Idleb	124.08						f	g	h				F13	10.16	50	108	137	114.75	119	132.75
				Mollar de Cieza	124.08						f	g	h				F13	9.586	25	112	136	114	126	136
				Craputea	124.07						f	g	h				F13	9.129	26	107	138	118	121	134
				Dhokar	124.07						f	g	h				F13	10.59	26	108	137	117	120.5	132
				Nevado Rizado	124.07						f	g	h				F13	7.640	14	109	136	121	121	131.75
				Picual	124.06						f	g	h				F13	8.286	31	107	139	119	121	131.5
				Ornellaia	124.04						f	g	h				F13	11.14	21	107	138	118	119	138
				Buga	124						f	g	h				F13	7.859	18	114	133	117.25	122.5	132.75
				Kato Drys	124						f	g	h				F13	7.825	72	107	139	119	123	131.25
				Koutsourelia	123.91						f	g	h				F13	8.039	12	112	136	118	122	131
				Azeradj Tamokra	123.85						f	g	h				F13	8.668	7	114	133	118	118	133
				Varudo	123.85						f	g	h				F13	7.174	7	119	136	119	119	127.5
				Verdial transmontana	123.85						f	g	h				F13	9.172	14	113	132	114	131	131.75
				Morisca	123.81						f	g	h				F13	7.487	22	112	136	119	122.5	126
				Zaity	123.81						f	g	h				F13	8.352	11	108	133	118	126	132
				Nocellara Etnea	123.75						f	g	h				F13	10.81	12	109	138	116.75	119	132.75
				Cavalieri	123.71						f	g	h				F13	11.51	7	110	138	114	126	132
				Manzanilla de Montefrío	123.69						f	g	h				F13	9.638	13	112	136	119	119	136
				Puntoza	123.69						f	g	h				F13	9.401	13	108	133	117	126	132
				Abou Anaked	123.66						f	g	h				F13	12.85	9	108	137	108	132	132
				Maremmano	123.66						f	g	h				F13	11.32	12	107	138	118.25	120	132.75
				Bosana	123.64						f	g	h				F13	9.256	34	112	138	118	120	131
				Bottone di gallo	123.62						f	g	h				F13	10.43	8	111	138	117.25	122.5	129
				Tempranillo de Yeste-274	123.6						f	g	h				F13	9.465	10	112	136	114	126	130.5
				Morrut	123.58						f	g	h				F13	8.185	17	114	136	114	123	132
				Nerba	123.58						f	g	h				F13	10.21	17	111	138	116	118	131
				Bouchouk Lafayette	123.5						f	g	h				F13	9.093	6	110	133	118.25	124	131.25
				Humaisi	123.5						f	g	h				F13	11.48	10	108	137	118	120	135.75
				Khadraya	123.5						f	g	h				F13	13.37	4	108	137	114.75	124.5	133.25
				Nevado Basto	123.5						f	g	h				F13	6.293	10	118	136	118	123	125.25
				Ronde de la Ménara	123.5						f	g	h				F13	9.743	10	108	133	117	124.5	132
				Zeletni	123.5						f	g	h				F13	11.03	4	110	133	116.75	125.5	132.25
				Aaleth	123.47						f	g	h				F13	10.46	21	108	137	117	119	133
				Ojo de Liebre	123.46						f	g	h				F13	8.818	13	111	136	121	121	126
				Abbadi Shalal	123.45						f	g	h				F13	12.65	11	108	144	114.5	121	134.5
				Callosina	123.4						f	g	h				F13	6.308	5	118	133	118	122	126
				Picholine Marocaine	123.38						f	g	h				F13	8.639	225	107	139	117	123	132
				Calatina	123.35						f	g	h				F13	12.20	14	107	138	112.25	120	134
				Albatro	123.33						f	g	h				F13	11.74	12	107	138	118	119.5	138
				Wateken	123.33						f	g	h				F13	4.618	3	118	126	122	126	126
				Ferkani	123.30						f	g	h				F13	10.36	23	108	137	117	119	132.5
				Frantoio	123.28						f	g	h				F13	10.73	174	107	145	114.5	119	132
				Rossello	123.26						f	g	h				F13	10.49	15	111	138	114	123	132
				Khalkhali-629	123.25						f	g	h				F13	11.43	8	108	137	113	123	133.25
				Loaime	123.2						f	g	h				F13	8.905	15	114	136	115	123	131
				Hamed	123.16						f	g	h				F13	12.05	6	108	137	115	121.5	134
				Mawi	123.14						f	g	h				F13	10.87	21	108	137	114	118	132
				Toffahi-621	123.12						f	g	h				F13	12.65	8	108	137	112.5	124.5	133.25
				Jlot	123.07						f	g	h				F13	10.27	40	108	144	114	119	132
				Kaissy	123.05						f	g	h				F13	11.72	34	108	144	114	119	135.75
				Sivigliana da Olio	123.05						f	g	h				F13	8.451	17	110	138	116	119	131
				Azeboudj de Khirane	123						f	g	h				F13	11.83	7	110	137	114	117	134.5
				Hemblasi-601	123						f	g	h				F13	10.21	9	108	137	118	121	132
				Palomar	123						f	g	h				F13	9.092	10	114	136	114	121	132
				Santa Martinenga	123						f	g	h				F13	10.64	15	107	138	116	119	134.5
				Sinopolese	123						f	g	h				F13	14.10	3	110	138	115.5	121	129.5
				Teffah	123						f	g	h				F13	12.05	7	108	137	112.5	126	132.5
				Manzanilla de Agua	122.87						f	g	h				F13	8.792	16	107	136	118	122	127.5
				Royal de Cazorla	122.87						f	g	h				F13	8.073	16	111	136	114	121	131.25
				Moresca	122.87						f	g	h				F13	11.58	31	107	138	113	118	134.5
				Ciciarello	122.84						f	g	h				F13	11.42	13	107	138	117	121	138
				Zael Al Muhra	122.82						f	g	h				F13	11.83	28	108	144	108	122.5	132
				Manzanilla de Hellín	122.81						f	g	h				F13	10.34	11	113	136	114	116	134
				Picholine	122.76						f	g	h				F13	9.896	26	106	138	114	122	132
				Ocal	122.75						f	g	h				F13	8.206	60	110	137	114	122	127.5
				Cucca	122.72						f	g	h				F13	12.77	11	107	138	115	118	138
				Enagua de Arenas	122.68						f	g	h				F13	8.776	16	112	136	116.75	120.5	127.5
				Unkown-OZ1-538	122.68						f	g	h				F13	9.603	16	108	137	117	118.5	132.25
				Abiad Min Omou	122.66						f	g	h				F13	10.97	9	108	137	114	119	132
				Fouji vert	122.64						f	g	h				F13	8.115	17	108	133	118	122	133
				Negrillo de Estepa	122.64						f	g	h				F13	9.026	14	111	134	114.5	119	132
				Beladi-577	122.63						f	g	h				F13	8.651	11	108	137	118	119	129.5
				Cerasuola	122.63						f	g	h				F13	11.41	11	109	138	114.5	118	132
				Zalmati-299	122.62						f	g	h				F13	8.210	8	110	133	117.75	122	127.75
				Bed Al Iguel	122.61						f	g	h				F13	11.58	18	108	144	114.75	118	132
				Beladi	122.60						f	g	h				F13	8.407	366	107	146	116	121	132
				Sebhawy	122.6						f	g	h				F13	10.65	10	108	133	114	125	132
				Kerdi	122.57						f	g	h				F13	11.39	7	108	137	114	121	132
				Samo	122.55						f	g	h				F13	11.95	9	108	137	114	118	132
				Velika Lastovka	122.5						f	g	h				F13	10.77	12	108	137	113.5	122	132.25
				Pidicuddara	122.46						f	g	h				F13	12.50	13	107	141	113	114	138
				Bouchouika	122.41						f	g	h				F13	8.617	12	114	137	114	122	127.75
				Mantonica	122.4						f	g	h				F13	11.08	10	107	138	118	120.5	129.75
				Crastu	122.37						f	g	h				F13	8.634	8	112	134	117.25	121	128
				Tebabs	122.37						f	g	h				F13	11.59	16	108	137	111.75	118.5	132.25
				Leccino	122.35						f	g	h				F13	6.869	20	107	134	118.75	121	131
				Nasitana Frutto Grosso	122.33						f	g	h				F13	11.31	15	111	138	111.5	121	134.5
				Souidi	122.33						f	g	h	i			F14	9.237	3	117	133	117	117	125
				Vasilikada	122.33						f	g	h	i			F14	9.378	15	111	136	114	123	131.5
				Baid El Hamam	122.3						f	g	h	i			F14	9.744	20	108	137	114	122	133
				Beldi	122.25						f	g	h	i			F14	11.37	8	108	137	115.5	122	128.75
				Vaddarica	122.25						f	g	h	i			F14	11.55	12	109	138	113.25	118.5	132.75
				Nocellara del Belice	122.18						f	g	h	i			F14	10.88	58	107	138	114	121	132
				Nociara	122.18						f	g	h	i			F14	8.797	22	107	138	116.5	121	128.5
				Villalonga	122.13						f	g	h	i			F14	8.567	15	113	132	114	126	131.5
				Alameño Blanco	122.12						f	g	h	i			F14	8.437	16	111	136	116.75	122	127.5
				Aggezi Shami	122.08						f	g	h	i			F14	7.936	12	110	137	116.25	122	126
				Aglandau	122.08						f	g	h	i			F14	9.380	24	107	132	114	123	132
				Sevillano de Jumilla	122.08						f	g	h	i			F14	8.564	12	111	136	114	123	127.5
				Lazzero	122.07						f	g	h	i			F14	11.49	13	107	138	116	118	138
				Mançanilha Algarvia	122.06						f	g	h	i			F14	9.807	16	111	132	113.5	122.5	131.25
				Gordal Sevillana	122.02						f	g	h	i			F14	10.97	44	106	138	114	118.5	134
				Aîmel	122						f	g	h	i	j		F15	8.660	3	117	132	117	117	124.5
				Giarraffa	122						f	g	h	i	j		F15	11.11	34	106	138	114	114	131
				Ifiri	122						f	g	h	i	j		F15	10.74	5	108	137	117	122	126
				Hojiblanca	121.93						f	g	h	i	j		F15	8.987	15	112	136	114	119	129
				Meslala	121.90						f	g	h	i	j		F15	9.454	21	108	133	114	118	133
				Sant Agostino	121.89						f	g	h	i	j		F15	9.299	37	111	145	114	119	126
				Bolvino	121.88						f	g	h	i	j		F15	4.728	9	118	131	118	121	126
				Nevado Azul	121.88						f	g	h	i	j		F15	8.923	18	112	136	113	121	123
				Olivo del Mulino	121.88						f	g	h	i	j		F15	12.01	18	107	138	111.5	121	131
				Azul	121.78						f	g	h	i	j		F15	9.815	14	110	136	110.75	126	130.5
				Berri Meslal-532	121.76						f	g	h	i	j		F15	9.238	13	108	137	114	122	126
				Verdala	121.72						f	g	h	i	j		F15	7.001	11	114	132	114	123	126
				Khashabi-631	121.71						f	g	h	i	j		F15	14.54	7	108	144	109	119	131.5
				Maraki	121.71						f	g	h	i	j		F15	15.37	7	98	144	113	125	129.5
				Negrita	121.68						f	g	h	i	j		F15	7.542	16	112	132	117.25	121	127.5
				Carrasqueño de Jumilla	121.64						f	g	h	i	j		F15	8.674	17	111	136	113	119	126
				Neb Jmel-283	121.58						f	g	h	i	j		F15	7.537	12	112	133	117	119.5	124.75
				Rapasayo	121.56						f	g	h	i	j		F15	9.926	16	111	136	114	116	128.5
				Grossa di Spagna	121.53						f	g	h	i	j		F15	9.709	13	109	138	112	119	131
				Intosso	121.5						f	g	h	i	j		F15	13.97	14	107	145	112.5	114	135
				Lumiaro	121.5						f	g	h	i	j		F15	10.95	10	111	138	112	118	129.75
				Manzanilla de Sevilla	121.44						f	g	h	i	j		F15	8.283	34	111	136	114	118	130.5
				Trillo	121.42						f	g	h	i	j		F15	12.86	14	101	138	111.25	121	135
				Alameño de Montilla	121.38						f	g	h	i	j		F15	8.451	13	111	132	114	126	126
				Morona	121.33						f	g	h	i	j		F15	9.470	12	111	136	114	117.5	131.25
				Sayali	121.33						f	g	h	i	j		F15	9.027	9	108	137	117	118	126
				Mignolo	121.30						f	g	h	i	j		F15	10.73	13	107	138	112	119	131
				Ensasi	121.25						f	g	h	i	j		F15	10.75	4	108	133	115.5	122	127.75
				Unkown-VS1-544	121.25						f	g	h	i	j		F15	9.881	8	108	137	116.25	117.5	127.75
				Abbadi Helo	121.2						f	g	h	i	j		F15	13.36	5	108	137	108	121	132
				Štorta	121.2						f	g	h	i	j		F15	9.600	10	108	137	114.75	117.5	129.5
				Confetto	121.13							g	h	i	j		F16	9.892	107	106	138	114	119	126
				Manzanilla de Abla	121.09							g	h	i	j		F16	11.11	11	112	136	113	114	134
				Llumeta	121.08							g	h	i	j		F16	11.32	12	106	136	113.75	120	128.5
				Bouteillan	120.83							g	h	i	j		F16	9.179	18	111	132	112.5	115	131
				Masabi	120.83							g	h	i	j		F16	10.73	12	108	144	115.5	118	126
				Koroneiki	120.81							g	h	i	j		F16	7.688	22	107	133	117.25	118	126
				Salonenque	120.8							g	h	i	j		F16	8.689	10	112	132	114	118.5	129.75
				Amargoso	120.75							g	h	i	j		F16	6.634	12	113	132	114	122	123
				Gerboui-298	120.75							g	h	i	j	k	F17	10.62	4	110	133	113	120	127.75
				Chalkidikis	120.71							g	h	i	j	k	F17	9.611	14	111	132	113.25	114	131
				Mastoidis	120.66							g	h	i	j	k	F17	8.105	12	111	132	112.75	118	127.25
				Jabaluna	120.62							g	h	i	j	k	F17	8.523	16	111	136	113.75	118.5	125.25
				Abbadi Abou Gabra-610	120.6							g	h	i	j	k	F17	13.44	5	108	137	108	118	132
				Bez El Anza	120.55							g	h	i	j	k	F17	9.824	9	108	133	114	117	132
				Unkown-VS5-547	120.54							g	h	i	j	k	F17	10.12	11	108	133	113	118	132
				Carolea	120.53							g	h	i	j	k	F17	10.13	26	107	138	113	117	126
				Chorruo	120.51							g	h	i	j	k	F17	8.144	29	109	136	116	119	123
				Olivo di Casavecchia	120.5							g	h	i	j	k	F17	11.74	8	107	145	117.5	121	121
				Uovo di Piccione	120.46							g	h	i	j	k	F17	6.345	13	107	131	119	121	126
				Lentisca-206	120.43							g	h	i	j	k	F17	8.648	16	107	132	116	121	123.75
				Mesyaf-662	120.4							g	h	i	j	k	F17	11.52	5	108	132	110	120	132
				Pico Limón de Grazalema	120.37							g	h	i	j	k	F17	8.090	16	111	132	113.75	118.5	125.25
				Agrarez	120.33							g	h	i	j	k	F17	10.96	3	114	133	114	114	123.5
				Cariasina	120.33							g	h	i	j	k	F17	11.35	15	107	138	112.5	117	127.5
				Unkown-VS2-545	120.32							g	h	i	j	k	F17	9.055	28	108	133	112	120	127.5
				Lastovka	120.27							g	h	i	j	k	F17	9.434	11	110	133	114	114	129.5
				Corbella	120.26							g	h	i	j	k	F17	7.591	15	111	132	114.5	118	123
				Cornicabra	120.17							g	h	i	j	k	F17	9.084	17	107	136	112	118	123
				Sevillenca	120.16							g	h	i	j	k	F17	8.528	18	106	132	112	119	126
				Karydolia	120.05							g	h	i	j	k	F17	8.466	17	111	132	112	114	126
				Lucques	120							g	h	i	j	k	F17	7.970	18	111	132	112	118	123
				Cayon	119.94							g	h	i	j	k	F17	9.370	17	109	132	112	114	131
				Empeltre	119.92							g	h	i	j	k	F17	8.291	13	111	136	113	118	123
				Karolia	119.91							g	h	i	j	k	F17	7.525	12	112	132	114	118.5	123.75
				Bissani-578	119.83							g	h	i	j	k	F17	10.77	6	108	132	110.5	119.5	129.25
				Aharoun	119.8							g	h	i	j	k	F17	11.96	5	108	137	110	118	126
				El Lewa	119.71							g	h	i	j	k	F17	5.122	7	114	126	115.5	119	124
				Abunara	119.64							g	h	i	j	k	F17	8.887	17	107	138	114	119	123
				Lechín de Sevilla	119.62							g	h	i	j	k	F17	8.155	16	111	132	113	114	126
				Rechino	119.62							g	h	i	j	k	F17	7.652	8	111	131	113.75	119	122
				Verdale	119.61							g	h	i	j	k	F17	8.098	13	111	132	114	114	123
				Kalokerida	119.55							g	h	i	j	k	F17	6.700	29	111	132	112	119	123
				Cornezuelo de Jaen	119.53							g	h	i	j	k	F17	10.08	15	109	136	112	114	126
				Lumbardeska	119.48							g	h	i	j	k	F17	10.67	29	108	137	108	118	132
				Verdial de Badajoz	119.45							g	h	i	j	k	F17	8.298	24	111	132	113.75	114	125.25
				Abou Monkar	119.42							g	h	i	j	k	F17	8.038	7	110	133	113.5	122	122
				Jaropo	119.42							g	h	i	j	k	F17	9.370	14	111	136	113	114	129.75
				Dulzal	119.38							g	h	i	j	k	F17	7.807	18	107	132	113	119	119
				Bical	119.27							g	h	i	j	k	F17	5.349	11	112	132	117	118	121
				Coratina	119.21							g	h	i	j	k	F17	8.829	19	109	134	112.5	117	128.5
				Cañivano Negro	119.05							g	h	i	j	k	F17	8.147	19	109	132	112	118	126
				Manzanilla Cacereña	118.92								h	i	j	k	F18	8.329	42	106	132	112.5	114	123
				Neb J'mel-452	118.8								h	i	j	k	F18	10.89	5	108	137	114	117	118
				Changlot Real	118.61								h	i	j	k	F18	8.789	13	111	131	112	114	131
				Cuoricino	118.55								h	i	j	k	F18	11.76	18	107	138	110.5	114	124
				Llorón de Atarfe	118.52								h	i	j	k	F18	8.337	17	111	132	112	114	123
				Cairo 7	118.5								h	i	j	k	F18	9.327	12	105	133	113	116	125.25
				Escarabajuelo de Úbeda	118.5								h	i	j	k	F18	6.082	20	111	132	112.75	118.5	121
				Tonda Iblea	118.4								h	i	j	k	F18	9.701	15	109	138	112	114	119
				Karbuncela	118.33								h	i	j	k	F18	8.732	9	108	132	114	117	119
				Salicino	118.3								h	i	j	k	F18	10.80	10	107	138	111	114	126.75
				Cima di Melfi	118.25								h	i	j	k	F18	6.130	4	111	126	116.25	118	120
				Maiatica di Ferrandina	118.25								h	i	j	k	F18	9.705	36	107	145	112	115	126
				Berri Meslal-397	118.18								h	i	j	k	F18	7.395	16	108	133	115.5	118.5	120.75
				Toffahi-486	118.18								h	i	j	k	F18	11.30	11	101	133	110	118	127.5
				Redondal	118								h	i	j	k	F18	8	16	109	132	112	114	126
				Arbequina	117.94								h	i	j	k	F18	9.093	17	97	136	114	114	126
				Chemchali	117.91								h	i	j	k	F18	8.712	12	108	133	112.5	117	119.25
				El Salam	117.81								h	i	j	k	F18	8.256	11	108	133	113	118	118
				Acebuchera	117.66								h	i	j	k	F18	6.169	12	113	126	113	114	126
				Vera	117.44								h	i	j	k	F18	4.503	9	113	123	114	114	123
				Aggezi Akse	117.42								h	i	j	k	F18	5.711	7	108	126	115.5	117	120
				Zarza	117.41								h	i	j	k	F18	6.901	17	111	136	112	119	123
				Madural-208	117.37								h	i	j	k	F18	4.240	16	112	123	113.5	117.5	120
				Sabatera	116.75								h	i	j	k	F18	7.670	20	97	123	114	121	123
				Fulla de Salze	116.5								h	i	j	k	F18	10.02	14	101	132	112.5	114	123
				Unkown-OT2-537	116.11								h	i	j	k	F18	6.565	9	108	126	110	117	122
				Farga	116									i	j	k	F19	5.237	15	111	123	112	114	123
				Sukkare	116									i	j	k	F19	2.828	2	114	118	115	116	117
				Varudo-275	115.92									i	j	k	F19	5.269	14	111	126	112	114	120.75
				Borriolenca	115.33										j	k	F20	9.810	12	105	132	105	115.5	119
				Dressi	115.27											k	F21	11.39	22	91	133	108.5	114	122
