# Supplementary material for: Statistical Approach to Assess Chill and Heat Requirements of Olive Tree Based on Flowering Date and Temperatures Data: Towards Selection of Adapted Cultivars to Global Warming
Source: Preprints.org preprint supplement (doi:10.20944/preprints202210.0211.v2), 2022-11-29
Supplement: Supplementary file 3 [file supplementary › Table S8.xlsx]

## Sheet: Table S8
Table S8. The chilling and heat requirements of analyzed WOGBM cultivars. Delineated by the PLS approach and estimated by the dynamic model (DM) for chilling and GDH model for forcing. FFD is Full flowering date, BLUP is Best linear unbiased prediction, CR is chilling requirement, HR is heat requirement and Std is standard deviation.
Cultivar	Mean of FFD	BLUP FFD	FFD clusters	Chilling						Heat
				Period (From)	Period (To)	Duration (days)	CR	Std	CR clusters	Period (From)	Period (To)	Duration (days)	HR	Std
Aaleth	123.47	117.35	Mid blooming	2019-12-31	2020-02-21	52	25.5	6.1563	Medium	2020-02-27	2020-05-16	79	20523.44	1256.91
Abbadi	127.72	119.36	Extra Late blooming blooming	2019-12-31	2020-02-20	51	24.83	6.40052	Medium	2020-02-27	2020-05-20	83	21828.81	1257.03
Abbadi Abou Gabra-610	120.6	117.45	Early blooming	2020-01-01	2020-02-21	51	25.5	6.1563	Medium	2020-02-28	2020-05-17	79	20690.89	1230.41
Abbadi Helo	121.2	118.66	Mid blooming	NA	NA	NA	NA	NA	NA	NA	NA	NA	NA	NA
Abbadi Shalal	123.45	119.72	Mid blooming	2020-01-01	2020-02-21	51	25.5	6.1563	Medium	2020-02-28	2020-05-20	82	21669.13	1261.64
Abiad Min Omou	122.66	116.52	Mid blooming	2019-12-26	2020-02-20	56	27	6.63325	Medium	2020-02-26	2020-05-15	79	20422.45	1269.36
Abou Anaked	123.66	117.8	Mid blooming	2020-01-01	2020-02-21	51	25.5	6.1563	Medium	2020-02-28	2020-05-17	79	20690.89	1230.41
Abou Monkar	119.42	113.97	Early blooming	2020-01-01	2020-01-27	26	13.17	3.37145	Low	2020-02-20	2020-04-14	54	12319.83	1121.1
Abunara	119.64	115.28	Early blooming	2019-12-29	2020-02-20	53	25.83	6.40052	Medium	2020-02-25	2020-05-18	83	21525.87	1211.93
Acebuchera	117.66	114.97	Early blooming	NA	NA	NA	NA	NA	NA	NA	NA	NA	NA	NA
Adkam	124.28	119.08	Late blooming	2019-12-31	2020-02-20	51	24.83	6.40052	Medium	2020-02-26	2020-05-20	84	21999.44	1250.76
Aggezi Akse	117.42	116.33	Early blooming	NA	NA	NA	NA	NA	NA	NA	NA	NA	NA	NA
Aggezi Oshime	126.37	116.27	Late blooming	2019-11-06	2020-02-17	103	41.83	9.34701	Highest	2020-02-20	2020-05-17	87	21975.68	1171.53
Aggezi Shami	122.08	114.65	Mid blooming	2020-01-02	2020-02-18	47	23.33	6.21825	Medium	2020-02-20	2020-05-12	82	20594.93	1268.7
Aglandau	122.08	115.28	Mid blooming	2020-01-01	2020-02-21	51	25.5	6.1563	Medium	2020-02-29	2020-05-12	73	19145.26	1294.49
Agrarez	120.33	112.58	Early blooming	NA	NA	NA	NA	NA	NA	NA	NA	NA	NA	NA
Aguenaou	125	114.73	Late blooming	2020-01-01	2020-02-19	49	24.33	5.98888	Medium	2020-02-21	2020-05-13	82	20738.09	1284.98
Aharoun	119.8	115.97	Early blooming	2019-12-29	2020-02-20	53	25.83	6.40052	Medium	2020-02-27	2020-05-17	80	20850.58	1225.85
Ahia Ousbaa	126.66	118.32	Extra Late blooming blooming	2019-12-04	2020-02-18	76	36	9.81835	Highest	2020-02-20	2020-05-17	87	21975.68	1171.53
Aîmel	122	117.66	Mid blooming	NA	NA	NA	NA	NA	NA	NA	NA	NA	NA	NA
Aitana	126.57	117.17	Extra Late blooming blooming	2019-11-04	2020-01-27	84	31.83	7.41395	High	2020-02-20	2020-05-18	88	22312.67	1176.13
Akenane	127	116.53	Extra Late blooming blooming	NA	NA	NA	NA	NA	NA	NA	NA	NA	NA	NA
Akerma	124.42	115.24	Late blooming	2019-11-05	2020-02-18	105	42.5	9.60729	Highest	2020-02-20	2020-05-15	85	21376.93	1217.78
Alameño Blanco	122.12	115.19	Mid blooming	2019-11-04	2020-01-26	83	31.5	7.39594	High	2020-02-20	2020-05-13	83	20858.58	1251.96
Alameño de Montilla	121.38	114.21	Mid blooming	2020-01-02	2020-01-26	24	12.33	3.20416	Low	2020-02-20	2020-05-12	82	20594.93	1268.7
Albatro	123.33	117.65	Mid blooming	2019-11-09	2020-02-21	104	43.66	9.4163	Highest	2020-02-29	2020-05-18	79	20862.99	1226.07
Allora	125.8	119.37	Late blooming	2019-12-03	2020-02-20	79	37	10.1193	Highest	2020-02-27	2020-05-19	82	21519.22	1245.07
Amargoso	120.75	114.84	Early blooming	2020-01-02	2020-02-17	46	22.66	5.88784	Medium	2020-02-20	2020-05-12	82	20594.93	1268.7
Americano	124.16	118.84	Late blooming	2019-12-31	2020-02-20	51	24.83	6.40052	Medium	2020-02-26	2020-05-19	83	21689.85	1238.53
Arbequina	117.94	113.55	Early blooming	2020-01-02	2020-01-25	23	12	3.4641	Low	2020-02-20	2020-05-11	81	20321.15	1293.71
Ascolana Tenera	125	117.73	Late blooming	2019-12-28	2020-02-21	55	27	5.96657	Medium	2020-02-27	2020-05-16	79	20523.44	1256.91
Atounsi Setif	124.76	114.84	Late blooming	2019-12-30	2020-02-21	53	26	5.93296	Medium	2020-02-28	2020-05-13	75	19573.78	1303.49
Azeboudj de Khirane	123	116.88	Mid blooming	2020-01-03	2020-01-26	23	12.17	3.0605	Low	2020-02-20	2020-05-17	87	21975.68	1171.53
Azeradj	124.66	116.04	Late blooming	2019-12-30	2020-02-21	53	26	5.93296	Medium	2020-02-27	2020-05-13	76	19733.47	1303.37
Azeradj Tamokra	123.85	113.38	Mid blooming	NA	NA	NA	NA	NA	NA	NA	NA	NA	NA	NA
Azul	121.78	114.17	Mid blooming	2020-01-04	2020-02-18	45	23	6	Medium	2020-02-20	2020-05-13	83	20858.58	1251.96
Baid El Hamam	122.3	115.65	Mid blooming	2019-12-29	2020-02-20	53	25.83	6.40052	Medium	2020-02-27	2020-05-14	77	19992.00	1293.97
Baladi	125	113.75	Late blooming	NA	NA	NA	NA	NA	NA	NA	NA	NA	NA	NA
Barouni	125	116.2	Late blooming	2019-12-04	2020-02-18	76	36	9.81835	Highest	2020-02-20	2020-05-13	83	20858.58	1251.96
Bed Al Iguel	122.61	117.87	Mid blooming	2019-12-31	2020-02-20	51	24.83	6.40052	Medium	2020-02-27	2020-05-19	82	21519.22	1245.07
Beladi	122.60	116.04	Mid blooming	2019-12-31	2020-02-21	52	25.5	6.1563	Medium	2020-02-26	2020-05-13	77	19904.10	1298.82
Beladi-577	122.63	115.84	Mid blooming	2019-12-22	2020-02-21	61	29.67	6.37704	Medium	2020-02-29	2020-05-14	75	19667.43	1279.26
Beldi	122.25	116.52	Mid blooming	2019-12-31	2020-02-21	52	25.5	6.1563	Medium	2020-02-28	2020-05-17	79	20690.89	1230.4
Berri Meslal-397	118.18	116.92	Early blooming	2019-12-30	2020-02-21	53	26	5.93296	Medium	2020-02-28	2020-05-13	75	19573.78	1303.49
Berri Meslal-532	121.76	115.68	Mid blooming	2019-12-29	2020-02-20	53	25.83	6.40052	Medium	2020-02-27	2020-05-14	77	19992.00	1293.97
Besbessi	124.8	114.07	Late blooming	NA	NA	NA	NA	NA	NA	NA	NA	NA	NA	NA
Bez El Anza	120.55	115.78	Early blooming	2019-12-30	2020-02-20	52	25.33	6.15359	Medium	2020-02-27	2020-05-13	76	19733.47	1303.37
Biancolilla-83	128.25	117.07	Extra Late blooming blooming	NA	NA	NA	NA	NA	NA	NA	NA	NA	NA	NA
Bical	119.27	114.28	Early blooming	2019-12-31	2020-02-19	50	24.33	5.98888	Medium	2020-02-21	2020-05-12	81	20474.45	1300.01
Bissani-578	119.83	117.87	Early blooming	NA	NA	NA	NA	NA	NA	NA	NA	NA	NA	NA
Blanqueta	124.36	118.41	Late blooming	2019-12-30	2020-02-22	54	26.67	5.81951	Medium	2020-02-29	2020-05-16	77	20198.87	1245.08
Bolvino	121.88	117.35	Mid blooming	NA	NA	NA	NA	NA	NA	NA	NA	NA	NA	NA
Borriolenca	115.33	110.82	Early blooming	2020-01-03	2020-02-19	47	23.67	5.81951	Medium	2020-02-20	2020-05-12	82	20594.93	1268.7
Bosana	123.64	116.82	Mid blooming	2019-12-31	2020-02-18	49	23.83	6.17792	Medium	2020-02-21	2020-05-18	87	22192.18	1207.71
Bottone di gallo	123.62	115.82	Mid blooming	2019-12-30	2020-02-18	50	24.33	5.92171	Medium	2020-02-21	2020-05-18	87	22192.18	1207.71
Bouchouika	122.41	114.64	Mid blooming	2020-01-02	2020-02-18	47	23.33	6.21825	Medium	2020-02-20	2020-05-14	84	21117.11	1238.23
Bouchouk Lafayette	123.5	114.49	Mid blooming	2019-11-04	2020-01-26	83	31.5	7.39594	High	2020-02-20	2020-05-13	83	20858.58	1251.95
Bouteillan	120.83	114.65	Early blooming	2020-01-02	2020-02-18	47	23.33	6.21825	Medium	2020-02-21	2020-05-12	81	20474.45	1300.01
Brandofino	126.14	117.73	Late blooming	NA	NA	NA	NA	NA	NA	NA	NA	NA	NA	NA
Buga	124	116.66	Late blooming	2020-01-02	2020-01-26	24	12.33	3.20416	Low	2020-02-20	2020-05-13	83	20858.58	1251.96
Cairo 7	118.5	113.63	Early blooming	2019-12-30	2020-02-20	52	25.33	6.15359	Medium	2020-02-26	2020-05-10	74	19087.91	1350.02
Calatina	123.35	118.19	Mid blooming	2019-12-30	2020-02-20	52	25.33	6.15359	Medium	2020-02-27	2020-05-18	81	21187.56	1232.96
Callosina	123.4	115.15	Mid blooming	NA	NA	NA	NA	NA	NA	NA	NA	NA	NA	NA
Cañivano Negro	119.05	114.4	Early blooming	2019-12-30	2020-02-18	50	24.33	5.92171	Medium	2020-02-21	2020-05-12	81	20474.45	1300.01
Cariasina	120.33	116	Early blooming	2019-12-04	2020-02-20	78	37	10.1193	Highest	2020-02-27	2020-05-18	81	21187.56	1232.96
Carolea	120.53	115.34	Early blooming	2019-12-27	2020-02-20	55	26.67	6.40833	Medium	2020-02-26	2020-05-17	81	21021.21	1219.87
Carrasqueño de Elvas	125.16	116.37	Late blooming	2020-01-02	2020-01-26	24	12.33	3.20416	Low	2020-02-20	2020-05-12	82	20594.93	1268.7
Carrasqueño de Jumilla	121.64	114.95	Mid blooming	2019-12-30	2020-02-18	50	24.33	5.92171	Medium	2020-02-21	2020-05-14	83	20996.62	1271.97
Carrasquillo	125.8	117.43	Late blooming	2019-12-04	2020-02-19	77	36.5	9.6902	Highest	2020-02-21	2020-05-16	85	21528.06	1231.77
Cassanese	126.16	117.33	Late blooming	2019-11-05	2020-01-26	82	31.5	7.39594	High	2020-02-20	2020-05-18	88	22312.67	1176.13
Castricianella rapparina	124.83	117.41	Late blooming	2019-12-29	2020-02-20	53	25.83	6.40052	Medium	2020-02-27	2020-05-18	81	21187.56	1232.96
Cavalieri	123.71	116.2	Mid blooming	2020-01-02	2020-02-20	49	24.33	6.47045	Medium	2020-02-27	2020-05-18	81	21187.56	1232.96
Cayon	119.94	114.51	Early blooming	2020-01-01	2020-02-18	48	23.83	6.17792	Medium	2020-02-20	2020-05-12	82	20594.93	1268.7
Cerasuola	122.63	115.81	Mid blooming	2019-11-04	2020-01-26	83	31.5	7.39594	High	2020-02-20	2020-05-18	88	22312.67	1176.13
Cerezuela	125.16	118.33	Late blooming	2019-12-29	2020-02-22	55	27.17	6.08002	Medium	2020-02-28	2020-05-17	79	20690.89	1230.41
Chalkidikis	120.71	115.28	Early blooming	2020-01-05	2020-01-25	20	10.83	3.0605	Low	2020-02-20	2020-05-12	82	20594.93	1268.7
Changlot Real	118.61	115.51	Early blooming	NA	NA	NA	NA	NA	NA	NA	NA	NA	NA	NA
Chemchali	117.91	116.09	Early blooming	2019-12-30	2020-02-21	53	26	5.93296	Medium	2020-02-27	2020-05-13	76	19733.47	1303.37
Chemlal de Kabilye	130.5	116.23	Extra Late blooming blooming	NA	NA	NA	NA	NA	NA	NA	NA	NA	NA	NA
Chetoui	124.18	117.77	Late blooming	2020-01-01	2020-01-27	26	13.17	3.37145	Low	2020-02-20	2020-05-16	86	21648.55	1198.85
Chorruo	120.51	114.92	Early blooming	2019-11-03	2020-01-26	84	31.67	7.03325	High	2020-02-20	2020-05-14	84	21117.11	1238.23
Ciciarello	122.84	117.53	Mid blooming	2019-12-03	2020-02-20	79	37	10.1193	Highest	2020-02-29	2020-05-18	79	20862.99	1226.07
Cima di Melfi	118.25	115.66	Early blooming	NA	NA	NA	NA	NA	NA	NA	NA	NA	NA	NA
Cirujal	125	117.47	Late blooming	2019-12-29	2020-02-20	53	25.83	6.40052	Medium	2020-02-26	2020-05-19	83	21689.85	1238.53
Çobrancosa	125.66	115.43	Late blooming	NA	NA	NA	NA	NA	NA	NA	NA	NA	NA	NA
Confetto	121.13	115.35	Mid blooming	2019-12-29	2020-02-20	53	25.83	6.40052	Medium	2020-02-25	2020-05-16	81	20861.75	1236.99
Coratina	119.21	114.97	Early blooming	2020-01-01	2020-01-26	25	12.83	3.3116	Low	2020-02-21	2020-05-11	80	20200.67	1323.03
Corbella	120.26	114.38	Early blooming	2020-01-01	2020-01-26	25	12.83	3.3116	Low	2020-02-20	2020-05-12	82	20594.93	1268.7
Cordovil de Serpa	124.15	115.36	Late blooming	2020-01-04	2020-02-19	46	23.5	5.82237	Medium	2020-02-20	2020-05-05	75	18552.20	1309.26
Cornezuelo de Jaen	119.53	114.06	Early blooming	2020-01-01	2020-02-18	48	23.83	6.17792	Medium	2020-02-20	2020-05-16	86	21648.55	1198.85
Cornicabra	120.17	115.11	Early blooming	2019-12-23	2020-02-20	59	28.5	6.83374	Medium	2020-02-26	2020-05-16	80	20694.07	1250.84
Craputea	124.07	117.42	Late blooming	2019-12-30	2020-02-21	53	26	5.93296	Medium	2020-02-27	2020-05-15	78	20251.82	1274.89
Crastu	122.37	114.97	Mid blooming	2019-12-31	2020-02-19	50	24.33	5.98888	Medium	2020-02-21	2020-05-14	83	20996.62	1271.97
Crnica-399	124.33	116.63	Late blooming	2020-01-03	2020-01-27	24	12.5	3.08221	Low	2020-02-20	2020-05-13	83	20858.58	1251.96
Cucca	122.72	116.37	Mid blooming	2019-12-04	2020-02-20	78	37	10.1193	Highest	2020-02-28	2020-05-18	80	21027.87	1238.16
Cuoricino	118.55	115.85	Early blooming	2019-12-29	2020-02-20	53	25.83	6.40052	Medium	2020-02-26	2020-05-18	82	21358.19	1226.56
Dhokar	124.07	117.91	Late blooming	2019-12-30	2020-02-21	53	26	5.93296	Medium	2020-02-27	2020-05-17	80	20850.58	1225.85
Djlot Tadmori	124.5	117.43	Late blooming	2020-01-01	2020-02-22	52	26.17	6.08002	Medium	2020-03-01	2020-05-13	73	19197.52	1262.45
Dolce di Rossano	126.81	119.1	Extra Late blooming blooming	2020-01-02	2020-01-26	24	12.33	3.20416	Low	2020-02-20	2020-05-18	88	22312.67	1176.13
Dressi	115.27	112.57	Early blooming	2020-01-01	2020-01-25	24	12.5	3.61939	Low	2020-02-19	2020-05-13	84	20979.82	1220.08
Dritta di Moscufa	126.12	119.23	Late blooming	2020-01-01	2020-02-21	51	25.5	6.1563	Medium	2020-02-28	2020-05-20	82	21669.13	1261.64
Dulzal	119.38	114.03	Early blooming	2019-12-20	2020-02-21	63	31	6.9857	High	2020-02-28	2020-05-12	74	19310.13	1312.5
El Lewa	119.71	115.75	Early blooming	NA	NA	NA	NA	NA	NA	NA	NA	NA	NA	NA
El Salam	117.81	114.18	Early blooming	2019-12-02	2020-02-20	80	37.33	10.2111	Highest	2020-02-28	2020-05-13	75	19573.78	1303.49
Emilia	125.26	119.17	Late blooming	2019-12-30	2020-02-21	53	26	5.93296	Medium	2020-02-28	2020-05-18	80	21027.87	1238.16
Empeltre	119.92	115.03	Early blooming	2019-12-30	2020-02-18	50	24.33	5.92171	Medium	2020-02-21	2020-05-16	85	21528.06	1231.77
Enagua de Arenas	122.68	115.2	Mid blooming	2019-12-31	2020-02-18	49	23.83	6.17792	Medium	2020-02-21	2020-05-15	84	21256.44	1251.31
Ensasi	121.25	115.87	Mid blooming	2019-12-31	2020-02-21	52	25.5	6.1563	Medium	2020-02-29	2020-05-13	74	19408.90	1286.69
Escarabajuelo de Posadas	124.4	116.93	Late blooming	2020-01-01	2020-02-17	47	23.17	5.84523	Medium	2020-02-20	2020-05-17	87	21975.68	1171.53
Escarabajuelo de Úbeda	118.5	113.45	Early blooming	2019-12-30	2020-02-17	49	23.67	5.57375	Medium	2020-02-20	2020-05-08	78	19465.50	1331.65
Farga	116	112.49	Early blooming	2020-01-01	2020-01-26	25	12.83	3.3116	Low	2020-02-20	2020-05-03	73	17888.01	1290.36
Fasolona	124.92	118.1	Late blooming	2019-12-04	2020-02-18	76	36	9.81835	Highest	2020-02-20	2020-05-18	88	22312.67	1176.13
Ferkani	123.30	117.54	Mid blooming	2019-12-31	2020-02-21	52	25.5	6.1563	Medium	2020-02-27	2020-05-15	78	20251.82	1274.89
Fouji vert	122.64	114.9	Mid blooming	2019-12-29	2020-02-21	54	26.5	6.1563	Medium	2020-02-29	2020-05-13	74	19408.90	1286.69
Frantoio	123.28	117.64	Mid blooming	2019-12-30	2020-02-20	52	25.33	6.15359	Medium	2020-02-26	2020-05-19	83	21689.85	1238.53
Fulla de Salze	116.5	112.08	Early blooming	2019-12-31	2020-01-26	26	12.83	3.3116	Low	2020-02-20	2020-05-12	82	20594.93	1268.7
Galega Vulgar	125.61	116.41	Late blooming	2020-01-03	2020-01-27	24	12.5	3.08221	Low	2020-02-20	2020-05-12	82	20594.93	1268.7
Gemlik	127.73	117.84	Extra Late blooming blooming	2019-12-31	2020-02-22	53	26.17	6.08002	Medium	2020-02-29	2020-05-17	78	20526.01	1217.68
Gentile di chieti	127.18	118.49	Extra Late blooming blooming	2019-12-29	2020-02-21	54	26.5	6.1563	Medium	2020-02-28	2020-05-18	80	21027.87	1238.16
Gerboui	126	117.09	Late blooming	NA	NA	NA	NA	NA	NA	NA	NA	NA	NA	NA
Gerboui-298	120.75	114.49	Early blooming	2020-01-02	2020-01-26	24	12.33	3.20416	Low	2020-02-20	2020-05-13	83	20858.58	1251.96
Giarfara	124.63	117.59	Late blooming	2019-12-30	2020-02-21	53	26	5.93296	Medium	2020-02-27	2020-05-17	80	20850.58	1225.85
Giarraffa	122	115.88	Mid blooming	2020-01-02	2020-02-17	46	22.67	5.88784	Medium	2020-02-20	2020-05-18	88	22312.67	1176.13
Gordal de Granada	124.97	115.61	Late blooming	2019-12-30	2020-02-21	53	26	5.93296	Medium	2020-02-27	2020-05-15	78	20251.82	1274.89
Gordal Sevillana	122.02	115.25	Mid blooming	2019-12-28	2020-02-20	54	26.33	6.21825	Medium	2020-02-25	2020-05-17	82	21188.89	1205.47
Grappolo	124.5	119.69	Late blooming	2019-12-29	2020-02-21	54	26.5	6.1563	Medium	2020-02-27	2020-05-18	81	21187.56	1232.96
Gremigno di Fauglia	130.22	119.59	Extra Late blooming blooming	2020-01-02	2020-02-18	47	23.33	6.21825	Medium	2020-02-20	2020-05-18	88	22312.67	1176.13
Grossa di Spagna	121.53	116.35	Mid blooming	2019-12-31	2020-02-18	49	23.83	6.17792	Medium	2020-02-21	2020-05-18	87	22192.18	1207.71
Grossane-194	125.4	115.26	Late blooming	NA	NA	NA	NA	NA	NA	NA	NA	NA	NA	NA
Habichuelero de Grazalema	124.61	115.77	Late blooming	2020-01-02	2020-02-18	47	23.33	6.21825	Medium	2020-02-20	2020-05-13	83	20858.58	1251.96
Hamed	123.16	117.94	Mid blooming	2019-12-02	2020-02-20	80	37.33	10.2111	Highest	2020-02-28	2020-05-17	79	20690.89	1230.41
Hamra	125.04	117.52	Late blooming	NA	NA	NA	NA	NA	NA	NA	NA	NA	NA	NA
Hemblasi-601	123	116.84	Mid blooming	2019-12-02	2020-02-20	80	37.33	10.2111	Highest	2020-02-27	2020-05-17	80	20850.58	1225.85
Heraktane	125.5	118.63	Late blooming	2020-01-01	2020-02-20	50	24.83	6.40052	Medium	2020-02-26	2020-05-17	81	21021.21	1219.87
Hojiblanca	121.93	114.6	Mid blooming	2020-01-01	2020-02-19	49	24.33	5.98888	Medium	2020-02-21	2020-05-15	84	21256.44	1251.31
Humaisi	123.5	118.07	Mid blooming	2019-12-31	2020-02-21	52	25.5	6.1563	Medium	2020-02-28	2020-05-17	79	20690.89	1230.41
Idleb	124.08	117.2	Late blooming	2019-12-30	2020-02-20	52	25.33	6.15359	Medium	2020-02-27	2020-05-17	80	20850.58	1225.85
Ifiri	122	115.85	Mid blooming	2019-12-31	2020-02-21	52	25.5	6.1563	Medium	2020-02-28	2020-05-17	79	20690.89	1230.41
Intosso	121.5	115.74	Mid blooming	2019-12-29	2020-02-19	52	25.33	5.98888	Medium	2020-02-25	2020-05-19	84	21857.54	1223.21
Istarska crnica	124.42	118.93	Late blooming	2020-01-01	2020-02-21	51	25.5	6.1563	Medium	2020-02-27	2020-05-17	80	20850.58	1225.85
Itrana	124.31	118.16	Late blooming	2019-12-28	2020-02-20	54	26.33	6.21825	Medium	2020-02-26	2020-05-20	84	21999.44	1250.76
Jabaluna	120.62	114.08	Early blooming	2020-01-02	2020-02-18	47	23.33	6.21825	Medium	2020-02-20	2020-05-13	83	20858.58	1251.96
Jaropo	119.42	114.98	Early blooming	2020-01-01	2020-02-18	48	23.83	6.17792	Medium	2020-02-20	2020-05-14	84	21117.11	1238.24
Jlot	123.07	116.53	Mid blooming	2019-12-30	2020-02-20	52	25.33	6.15359	Medium	2020-02-26	2020-05-17	81	21021.21	1219.87
Kaissy	123.05	117.92	Mid blooming	2019-12-30	2020-02-21	53	26	5.93296	Medium	2020-02-27	2020-05-18	81	21187.56	1232.96
Kalokerida	119.55	114.16	Early blooming	2019-12-29	2020-02-18	51	24.83	6.17792	Medium	2020-02-21	2020-05-12	81	20474.45	1300.01
Karamani	127.52	118.31	Extra Late blooming blooming	2019-12-02	2020-02-20	80	37.33	10.2111	Highest	2020-02-27	2020-05-18	81	21187.56	1232.96
Karbuncela	118.33	117.98	Early blooming	NA	NA	NA	NA	NA	NA	NA	NA	NA	NA	NA
Karme	124.5	119.66	Late blooming	NA	NA	NA	NA	NA	NA	NA	NA	NA	NA	NA
Karolia	119.91	113.54	Early blooming	2020-01-02	2020-02-19	48	23.83	6.04704	Medium	2020-02-21	2020-05-12	81	20474.45	1300.01
Karydolia	120.05	113.6	Early blooming	2020-01-01	2020-02-18	48	23.83	6.17792	Medium	2020-02-20	2020-05-12	82	20594.93	1268.7
Kato Drys	124	116.76	Late blooming	2019-12-30	2020-02-21	53	26	5.93296	Medium	2020-02-27	2020-05-13	76	19733.47	1303.37
Kerdi	122.57	117.21	Mid blooming	2019-12-29	2020-02-20	53	25.83	6.40052	Medium	2020-02-27	2020-05-17	80	20850.58	1225.85
Khadraya	123.5	117.3	Mid blooming	2020-01-02	2020-02-21	50	25	6.22896	Medium	2020-02-28	2020-05-17	79	20690.89	1230.41
Khalkhali-629	123.25	118	Mid blooming	2019-12-31	2020-02-21	52	25.5	6.1563	Medium	2020-02-28	2020-05-17	79	20690.89	1230.41
Khashabi-631	121.71	117.56	Mid blooming	2019-12-31	2020-02-21	52	25.5	6.1563	Medium	2020-02-28	2020-05-19	81	21359.54	1250.34
Khnfse	125.37	116.53	Late blooming	2019-11-05	2020-02-17	104	41.83	9.34701	Highest	2020-02-20	2020-05-18	88	22312.67	1176.13
Khodieri	125.2	117.17	Late blooming	2019-12-29	2020-02-21	54	26.5	6.1563	Medium	2020-02-28	2020-05-14	76	19832.31	1294.95
Kolybada	125.46	116.34	Late blooming	2019-12-01	2020-02-21	82	38.5	10.2323	Highest	2020-02-29	2020-05-12	73	19145.26	1294.49
Koroneiki	120.81	114.82	Early blooming	2019-12-26	2020-02-21	57	27.67	6.37704	Medium	2020-02-28	2020-05-12	74	19310.13	1312.5
Kossiem	125.8	116.4	Late blooming	2019-11-08	2020-02-18	102	42.17	9.51665	Highest	2020-02-20	2020-05-13	83	20858.58	1251.96
Kothreiki	125.66	115.49	Late blooming	2019-11-08	2020-02-19	103	42.67	9.39503	Highest	2020-02-20	2020-05-16	86	21648.55	1198.85
Koutsourelia	123.91	116.3	Late blooming	2020-01-01	2020-02-18	48	23.83	6.17792	Medium	2020-02-21	2020-05-14	83	20996.62	1271.97
Lastovka	120.27	113.68	Early blooming	2020-01-01	2020-02-18	48	23.83	6.17792	Medium	2020-02-20	2020-05-13	83	20858.58	1251.96
Lastrino	131.64	120.75	Extra Late blooming blooming	NA	NA	NA	NA	NA	NA	NA	NA	NA	NA	NA
Lazzero	122.07	116.53	Mid blooming	2019-12-04	2020-02-20	78	37	10.1193	Highest	2020-02-28	2020-05-18	80	21027.87	1238.16
Lazzero di prata	126.30	119.92	Late blooming	2019-12-31	2020-02-20	51	24.83	6.40052	Medium	2020-02-27	2020-05-19	82	21519.22	1245.07
Leccino	122.35	118.69	Mid blooming	2019-11-21	2020-02-24	95	42.83	9.66264	Highest	2020-03-06	2020-05-12	67	17770.59	1164.42
Leccio Maremmano	124.83	118.51	Late blooming	2019-12-30	2020-02-22	54	26.67	5.81951	Medium	2020-02-28	2020-05-18	80	21027.87	1238.16
Lechin de Granada	125.92	117.66	Late blooming	2019-12-31	2020-02-22	53	26.17	6.08002	Medium	2020-02-29	2020-05-14	75	19667.43	1279.26
Lechín de Sevilla	119.62	113.98	Early blooming	2020-01-01	2020-02-18	48	23.83	6.17792	Medium	2020-02-20	2020-05-12	82	20594.93	1268.7
Lentisca-206	120.43	117.79	Early blooming	2019-12-02	2020-02-21	81	38	9.95992	Highest	2020-03-02	2020-05-12	71	18691.27	1238.99
Lentisca-244	125.53	117.94	Late blooming	NA	NA	NA	NA	NA	NA	NA	NA	NA	NA	NA
Limoncillo	126.07	116.74	Late blooming	2019-12-02	2020-02-22	82	38.67	9.91295	Highest	2020-03-01	2020-05-16	76	19987.49	1222.48
Llorón de Atarfe	118.52	112.98	Early blooming	2019-12-31	2020-02-18	49	23.83	6.17792	Medium	2020-02-20	2020-05-12	82	20594.93	1268.7
Llumeta	121.08	114.46	Mid blooming	2020-01-02	2020-01-26	24	12.33	3.20416	Low	2020-02-20	2020-05-16	86	21648.55	1198.85
Loaime	123.2	115.91	Mid blooming	2020-01-02	2020-02-18	47	23.33	6.21825	Medium	2020-02-20	2020-05-16	86	21648.55	1198.85
Lucques	120	114.05	Early blooming	2019-12-30	2020-02-18	50	24.33	5.92171	Medium	2020-02-21	2020-05-12	81	20474.45	1300.01
Lumbardeska	119.48	118.25	Early blooming	2019-12-31	2020-02-21	52	25.5	6.1563	Medium	2020-02-27	2020-05-17	80	20850.58	1225.85
Lumiaro	121.5	115.81	Mid blooming	2019-12-31	2020-02-18	49	23.83	6.17792	Medium	2020-02-21	2020-05-18	87	22192.18	1207.71
Machorrón	124.76	115.72	Late blooming	NA	NA	NA	NA	NA	NA	NA	NA	NA	NA	NA
Madonna dell 'impruneta	127	120.64	Extra Late blooming blooming	2019-12-29	2020-02-22	55	27.17	6.08002	Medium	2020-02-29	2020-05-18	79	20862.99	1226.07
Madural-208	117.37	111.19	Early blooming	2019-12-17	2020-02-19	64	31.17	7.41395	High	2020-02-23	2020-05-03	70	17462.05	1314.06
Mahati-615	127.4	118.39	Extra Late blooming blooming	NA	NA	NA	NA	NA	NA	NA	NA	NA	NA	NA
Maiatica di Ferrandina	118.25	115.96	Early blooming	2019-12-27	2020-02-20	55	26.67	6.40833	Medium	2020-02-25	2020-05-19	84	21857.54	1223.21
Mançanilha Algarvia	122.06	114.8	Mid blooming	2020-01-02	2020-02-17	46	22.67	5.88784	Medium	2020-02-20	2020-05-12	82	20594.93	1268.7
Mantonica	122.4	116.6	Mid blooming	2019-12-31	2020-02-21	52	25.5	6.1563	Medium	2020-02-28	2020-05-18	80	21027.87	1238.16
Manzanilla Cacereña	118.92	113.13	Early blooming	2020-01-01	2020-02-18	48	23.83	6.17792	Medium	2020-02-20	2020-05-12	82	20594.93	1268.7
Manzanilla de Abla	121.09	114.44	Mid blooming	NA	NA	NA	NA	NA	NA	NA	NA	NA	NA	NA
Manzanilla de Agua	122.87	116.84	Mid blooming	2019-12-30	2020-02-21	53	26	5.93296	Medium	2020-02-27	2020-05-15	78	20251.82	1274.89
Manzanilla de Hellín	122.81	115.38	Mid blooming	2020-01-03	2020-02-18	46	23.17	5.98052	Medium	2020-02-20	2020-05-15	85	21376.93	1217.78
Manzanilla de Montefrío	123.69	115.62	Mid blooming	2020-01-01	2020-02-19	49	24.33	5.98888	Medium	2020-02-21	2020-05-16	85	21528.06	1231.77
Manzanilla de Sevilla	121.44	114.35	Mid blooming	2020-01-01	2020-02-18	48	23.83	6.17792	Medium	2020-02-21	2020-05-13	82	20738.09	1284.98
Maraki	121.71	115.93	Mid blooming	2019-12-02	2020-01-25	54	25	6.78233	Medium	2020-02-25	2020-05-19	84	21857.54	1223.21
Maremmano	123.66	118.04	Mid blooming	2019-12-29	2020-02-21	54	26.5	6.1563	Medium	2020-02-27	2020-05-18	81	21187.56	1232.96
Masabi	120.83	117.59	Early blooming	2019-12-31	2020-02-20	51	24.83	6.40052	Medium	2020-02-28	2020-05-19	81	21359.54	1250.34
Mastoidis	120.66	115.25	Early blooming	2019-12-31	2020-02-18	49	23.83	6.17792	Medium	2020-02-21	2020-05-12	81	20474.45	1300.01
Maurino	125.40	118.43	Late blooming	2019-12-31	2020-02-18	49	23.83	6.17792	Medium	2020-02-21	2020-05-19	88	22523.85	1220.21
Mavreya	124.85	115.94	Late blooming	2019-11-04	2020-01-25	82	31.17	7.67898	High	2020-02-20	2020-05-15	85	21376.93	1217.78
Mawi	123.14	117.61	Mid blooming	2019-12-31	2020-02-20	51	24.83	6.40052	Medium	2020-02-27	2020-05-16	79	20523.44	1256.91
Meloky	126.1	118.28	Late blooming	2020-01-01	2020-02-22	52	26.17	6.08002	Medium	2020-02-28	2020-05-17	79	20690.89	1230.41
Meslala	121.90	113.63	Mid blooming	2019-12-02	2020-02-20	80	37.33	10.2111	Highest	2020-02-28	2020-05-13	75	19573.78	1303.49
Mesyaf-641	128.33	118.23	Extra Late blooming blooming	2019-11-08	2020-01-26	79	31.17	7.27782	High	2020-02-20	2020-05-14	84	21117.11	1238.23
Mesyaf-662	120.4	118.15	Early blooming	NA	NA	NA	NA	NA	NA	NA	NA	NA	NA	NA
Mignolo	121.30	116.57	Mid blooming	2019-12-29	2020-02-20	53	25.83	6.40052	Medium	2020-02-26	2020-05-17	81	21021.21	1219.87
Mignolo Cerretano	124.21	117.29	Late blooming	2019-12-31	2020-01-27	27	13.17	3.37145	Low	2020-02-20	2020-05-18	88	22312.67	1176.13
Minekiri	125.36	119.81	Late blooming	2020-01-01	2020-02-20	50	24.83	6.40052	Medium	2020-02-27	2020-05-19	82	21519.22	1245.07
Mohazam Abou Satl	124.58	116.75	Late blooming	2020-01-02	2020-01-27	25	12.67	3.26599	Low	2020-02-20	2020-05-17	87	21975.68	1171.53
Mollar de Cieza	124.08	115.26	Late blooming	2020-01-01	2020-02-18	48	23.83	6.17792	Medium	2020-02-21	2020-05-16	85	21528.06	1231.77
Moraiolo	125.46	118.58	Late blooming	2019-12-31	2020-02-21	52	25.5	6.1563	Medium	2020-02-26	2020-05-18	82	21358.19	1226.56
Morchiaio	125.55	118.49	Late blooming	2019-12-29	2020-02-21	54	26.5	6.1563	Medium	2020-02-27	2020-05-18	81	21187.56	1232.96
Morchione	127.07	117.82	Extra Late blooming blooming	2019-12-02	2020-02-20	80	37.33	10.2111	Highest	2020-02-27	2020-05-18	81	21187.56	1232.96
Morcone	127.16	119.48	Extra Late blooming blooming	NA	NA	NA	NA	NA	NA	NA	NA	NA	NA	NA
Morello a punta	130	119.11	Extra Late blooming blooming	2019-11-05	2020-01-27	83	31.83	7.41395	High	2020-02-20	2020-05-18	88	22312.67	1176.13
Moresca	122.87	115.82	Mid blooming	2019-12-29	2020-02-20	53	25.83	6.40052	Medium	2020-02-25	2020-05-18	83	21525.87	1211.93
Morisca	123.81	116.14	Mid blooming	2019-12-31	2020-02-18	49	23.83	6.17792	Medium	2020-02-18	2020-05-16	88	21880.68	1151.11
Morona	121.33	115.53	Mid blooming	2020-01-03	2020-01-26	23	12.17	3.0605	Low	2020-02-20	2020-05-13	83	20858.58	1251.96
Morrut	123.58	114	Mid blooming	2020-01-04	2020-02-19	46	23.5	5.82237	Medium	2020-02-20	2020-05-13	83	20858.58	1251.96
Mortellino	125.7	117.31	Late blooming	2019-11-05	2020-01-26	82	31.5	7.39594	High	2020-02-20	2020-05-18	88	22312.67	1176.13
Nasitana Frutto Grosso	122.33	116.59	Mid blooming	2019-12-30	2020-02-18	50	24.33	5.92171	Medium	2020-02-21	2020-05-18	87	22192.18	1207.71
Neb J'mel-452	118.8	117.13	Early blooming	2019-12-03	2020-02-20	79	37	10.1193	Highest	2020-02-28	2020-05-17	79	20690.89	1230.41
Neb Jmel-283	121.58	114.57	Mid blooming	2020-01-01	2020-01-28	27	13.83	3.60093	Low	2020-02-20	2020-05-13	83	20858.58	1251.96
Negral de Sabiñan-255	125.5	115.79	Late blooming	2020-01-02	2020-02-19	48	23.83	6.04704	Medium	2020-02-21	2020-05-16	85	21528.06	1231.77
Negrillo de Arjona	125.57	118.62	Late blooming	2019-12-26	2020-02-20	56	27	6.63325	Medium	2020-02-26	2020-05-19	83	21689.85	1238.53
Negrillo de Estepa	122.64	116.33	Mid blooming	NA	NA	NA	NA	NA	NA	NA	NA	NA	NA	NA
Negrillo de Iznalloz	125.38	116.06	Late blooming	2019-12-31	2020-02-19	50	24.33	5.98888	Medium	2020-02-21	2020-05-16	85	21528.06	1231.77
Negrillo Redondo	124.64	116.29	Late blooming	2020-01-02	2020-02-19	48	23.83	6.04704	Medium	2020-02-21	2020-05-15	84	21256.44	1251.31
Negrita	121.68	114.38	Mid blooming	2019-12-31	2020-02-19	50	24.33	5.98888	Medium	2020-02-21	2020-05-12	81	20474.45	1300.01
Nerba	123.58	116.21	Mid blooming	2019-12-31	2020-02-18	49	23.83	6.17792	Medium	2020-02-21	2020-05-17	86	21855.20	1202.86
Nevado Azul	121.88	115.39	Mid blooming	2019-12-27	2020-02-18	53	25.67	6.18601	Medium	2020-02-21	2020-05-16	85	21528.06	1231.77
Nevado Basto	123.5	115.17	Mid blooming	2020-01-03	2020-02-19	47	23.67	5.81951	Medium	2020-02-20	2020-05-14	84	21117.11	1238.23
Nevado Rizado	124.07	117.17	Late blooming	2020-01-01	2020-02-19	49	24.33	5.98888	Medium	2020-02-20	2020-05-13	83	20858.58	1251.96
Nocellara del Belice	122.18	117.12	Mid blooming	2019-12-30	2020-02-20	52	25.33	6.15359	Medium	2020-02-26	2020-05-17	81	21021.21	1219.87
Nocellara Etnea	123.75	116.54	Mid blooming	2019-12-31	2020-02-18	49	23.83	6.17792	Medium	2020-02-21	2020-05-18	87	22192.18	1207.71
Nociara	122.18	118.57	Mid blooming	2019-12-29	2020-02-21	54	26.5	6.1563	Medium	2020-02-27	2020-05-18	81	21187.56	1232.96
Ocal	122.75	114.47	Mid blooming	2019-12-31	2020-02-18	49	23.83	6.17792	Medium	2020-02-21	2020-05-14	83	20996.62	1271.97
Ogliarola del Bradano	132.2	121.17	Extra Late blooming blooming	2019-12-02	2020-02-21	81	38	9.95992	Highest	2020-02-28	2020-05-20	82	21669.13	1261.64
Ogliarola del Vulture	125	119.24	Late blooming	2019-12-30	2020-02-21	53	26	5.93296	Medium	2020-02-27	2020-05-20	83	21828.81	1257
Ojo de Liebre	123.46	115.79	Mid blooming	2019-12-29	2020-02-18	51	24.83	6.17792	Medium	2020-02-21	2020-05-16	85	21528.06	1231.77
Olivastra di Montalcino	125.75	117.42	Late blooming	2020-01-01	2020-02-21	51	25.5	6.1563	Medium	2020-02-28	2020-05-17	79	20690.89	1230.41
Olivastra di Populonia	128	120.17	Extra Late blooming blooming	2019-12-02	2020-02-20	80	37.33	10.2111	Highest	2020-02-26	2020-05-20	84	21999.44	1250.76
Olivo de Mancha Real	125.09	116.73	Late blooming	2020-01-02	2020-02-19	48	23.83	6.04704	Medium	2020-02-21	2020-05-14	83	20996.62	1271.97
Olivo del Mulino	121.88	117.53	Mid blooming	2019-12-28	2020-02-20	54	26.33	6.21825	Medium	2020-02-27	2020-05-18	81	21187.56	1232.96
Olivo di Casavecchia	120.5	119.04	Early blooming	2019-12-03	2020-02-20	79	37	10.1193	Highest	2020-02-29	2020-05-19	80	21194.66	1237.22
Olivo di Mandanici	129	117.62	Extra Late blooming blooming	NA	NA	NA	NA	NA	NA	NA	NA	NA	NA	NA
Olivo di San Lorenzo	127	117.56	Extra Late blooming blooming	2019-11-05	2020-01-26	82	31.5	7.39594	High	2020-02-20	2020-05-18	88	22312.67	1176.13
Ornellaia	124.04	117.7	Late blooming	2019-12-31	2020-02-21	52	25.5	6.1563	Medium	2020-02-27	2020-05-18	81	21187.56	1232.96
Ottobratica	127.33	118.13	Extra Late blooming blooming	2019-11-05	2020-01-25	81	31.17	7.67898	High	2020-02-20	2020-05-18	88	22312.67	1176.13
Palomar	123	115.78	Mid blooming	2020-01-03	2020-02-18	46	23.17	5.98052	Medium	2020-02-20	2020-05-13	83	20858.58	1251.96
Passulunara	124.45	118.05	Late blooming	2019-12-29	2020-02-21	54	26.5	6.1563	Medium	2020-02-28	2020-05-18	80	21027.87	1238.16
Patronet	125.5	116.35	Late blooming	2019-11-09	2020-02-19	102	42.5	9.26823	Highest	2020-02-21	2020-05-16	85	21528.06	1231.77
Pendolino-162	126.12	118.67	Late blooming	2019-12-02	2020-02-20	80	37.33	10.2111	Highest	2020-02-27	2020-05-18	81	21187.56	1232.96
Piangente	124.73	118.95	Late blooming	2019-12-30	2020-02-20	52	25.33	6.15359	Medium	2020-02-26	2020-05-20	84	21999.44	1250.76
Picholine	122.76	114.46	Mid blooming	2019-12-31	2020-02-17	48	23.17	5.84523	Medium	2020-02-20	2020-05-15	85	21376.93	1217.78
Picholine Marocaine	123.38	116.34	Mid blooming	2019-12-30	2020-02-21	53	27.99	6.16	Medium	2020-02-27	2020-05-13	76	19733.47	1303.37
Pico Limón de Grazalema	120.37	113.9	Early blooming	2020-01-02	2020-02-18	47	23.33	6.21825	Medium	2020-02-20	2020-05-12	82	20594.93	1268.7
Picual	124.06	117.67	Late blooming	2019-12-27	2020-02-22	57	28	6.0663	Medium	2020-02-28	2020-05-15	77	20092.13	1276.5
Picudo	128.22	117.01	Extra Late blooming blooming	2019-11-08	2020-02-18	102	42.17	9.51665	Highest	2020-02-20	2020-05-19	89	22644.33	1189.65
Pidicuddara	122.46	115.99	Mid blooming	2019-12-30	2020-02-20	52	25.33	6.15359	Medium	2020-02-25	2020-05-18	83	21525.87	1211.93
Pikrolia	125.68	118.34	Late blooming	2019-12-02	2020-02-20	80	37.33	10.2111	Highest	2020-02-26	2020-05-19	83	21689.85	1238.53
Plementa Bjelica	125.2	118.06	Late blooming	2019-12-30	2020-02-21	53	26	5.93296	Medium	2020-02-26	2020-05-18	82	21358.19	1226.56
Puntoza	123.69	116.56	Mid blooming	2020-01-02	2020-02-20	49	24.33	6.47045	Medium	2020-02-26	2020-05-13	77	19904.10	1298.83
Rachati-181	124.85	118.36	Late blooming	2019-11-10	2020-02-18	100	41.83	9.30412	Highest	2020-02-21	2020-05-18	87	22192.18	1207.71
Racimal	124.91	117.33	Late blooming	2019-11-08	2020-02-18	102	42.17	9.51665	Highest	2020-02-20	2020-05-16	86	21648.55	1198.85
Rapasayo	121.56	115.05	Mid blooming	2020-01-01	2020-02-18	48	23.83	6.17792	Medium	2020-02-21	2020-05-16	85	21528.06	1231.77
Ravece	124.24	115.71	Late blooming	2019-12-23	2020-02-20	59	28.5	6.83374	Medium	2020-02-26	2020-05-17	81	21021.21	1219.88
Razzaio	127.8	118.55	Extra Late blooming blooming	2019-11-09	2020-01-27	79	31.33	7.0899	High	2020-02-20	2020-05-19	89	22644.33	1189.65
Rechino	119.62	116.7	Early blooming	NA	NA	NA	NA	NA	NA	NA	NA	NA	NA	NA
Redondal	118	113.67	Early blooming	2020-01-01	2020-02-18	48	23.83	6.17792	Medium	2020-02-20	2020-05-12	82	20594.93	1268.7
Remmani	125	118.21	Late blooming	2019-12-03	2020-02-21	80	37.67	9.87252	Highest	2020-02-28	2020-05-20	82	21669.13	1261.64
Ronde de la Ménara	123.5	117.12	Mid blooming	2020-01-01	2020-02-21	51	25.5	6.1563	Medium	2020-02-27	2020-05-13	76	19733.47	1303.37
Ronde de Miliana	126.15	115.83	Late blooming	2019-12-02	2020-02-21	81	38	9.95992	Highest	2020-02-28	2020-05-15	77	20092.13	1276.5
Rossellino	124.96	117.67	Late blooming	2019-12-31	2020-02-20	51	24.83	6.40052	Medium	2020-02-25	2020-05-19	84	21857.54	1223.21
Rossellino Cerretano	128.92	119.35	Extra Late blooming blooming	2019-12-02	2020-02-21	81	38	9.95992	Highest	2020-02-28	2020-05-18	80	21027.87	1238.16
Rossello	123.26	115.49	Mid blooming	2019-11-05	2020-01-27	83	31.83	7.41395	High	2020-02-20	2020-05-18	88	22312.67	1176.13
Rougette de Mitidja	124.18	115.2	Late blooming	2019-11-05	2020-01-27	83	31.83	7.41395	High	2020-02-20	2020-05-14	84	21117.11	1238.23
Royal de Cazorla	122.87	115.78	Mid blooming	2019-11-08	2020-01-26	79	31.17	7.27782	High	2020-02-20	2020-05-13	83	20858.58	1251.96
Sabatera	116.75	112.08	Early blooming	2020-01-03	2020-01-22	19	10	2.44949	Low	2020-02-19	2020-04-28	69	16806.67	1239.85
Salicino	118.3	117.16	Early blooming	NA	NA	NA	NA	NA	NA	NA	NA	NA	NA	NA
Salonenque	120.8	113.45	Early blooming	2020-01-02	2020-02-19	48	23.83	6.04704	Medium	2020-02-21	2020-05-12	81	20474.45	1300.01
Samo	122.55	117.69	Mid blooming	2019-12-31	2020-02-20	51	24.83	6.40052	Medium	2020-02-27	2020-05-17	80	20850.58	1225.85
San Francesco	124.30	116.58	Late blooming	2020-01-03	2020-02-18	46	23.17	5.98052	Medium	2020-02-20	2020-05-18	88	22312.67	1176.13
Sant Agostino	121.89	116.78	Mid blooming	2020-01-01	2020-02-18	48	23.83	6.17792	Medium	2020-02-20	2020-05-18	88	22312.67	1176.13
Santa Martinenga	123	117.84	Mid blooming	2019-12-29	2020-02-21	54	26.5	6.1563	Medium	2020-02-27	2020-05-18	81	21187.56	1232.96
Sayali	121.33	116.74	Mid blooming	2019-12-29	2020-02-21	54	26.5	6.1563	Medium	2020-02-27	2020-05-15	78	20251.82	1274.89
Sebhawy	122.6	116.65	Mid blooming	2019-12-31	2020-02-20	51	24.83	6.40052	Medium	2020-02-27	2020-05-13	76	19733.47	1303.37
Sevillano de Jumilla	122.08	114.19	Mid blooming	2020-01-02	2020-01-27	25	12.67	3.26599	Low	2020-02-20	2020-05-13	83	20858.58	1251.96
Sevillenca	120.16	114.63	Early blooming	2019-12-30	2020-02-18	50	24.33	5.92171	Medium	2020-02-21	2020-05-12	81	20474.45	1300.01
Simjaca	128.62	118.2	Extra Late blooming blooming	2019-11-09	2020-01-27	79	31.33	7.0899	High	2020-02-20	2020-05-17	87	21975.68	1171.53
Sinopolese	123	118.74	Mid blooming	NA	NA	NA	NA	NA	NA	NA	NA	NA	NA	NA
Sivigliana da Olio	123.05	118.52	Mid blooming	2019-12-30	2020-02-20	52	25.33	6.15359	Medium	2020-02-26	2020-05-18	82	21358.19	1226.56
Souidi	122.33	116.36	Mid blooming	2020-01-02	2020-02-18	47	23.33	6.21825	Medium	2020-02-20	2020-05-13	83	20858.58	1251.97
Štorta	121.2	116.62	Mid blooming	2019-12-30	2020-02-21	53	26	5.93296	Medium	2020-02-27	2020-05-15	78	20251.82	1274.89
Sukkare	116	116.53	Early blooming	NA	NA	NA	NA	NA	NA	NA	NA	NA	NA	NA
Tabelout	127.70	117.66	Extra Late blooming blooming	2019-11-06	2020-02-18	104	42.5	9.60729	Highest	2020-02-20	2020-05-17	87	21975.68	1171.53
Tanche-74	125.16	116.39	Late blooming	2020-01-03	2020-02-18	46	23.17	5.98052	Medium	2020-02-20	2020-05-13	83	20858.58	1251.96
Tarabelsi	126.12	117.01	Late blooming	2019-12-30	2020-02-20	52	25.33	6.15359	Medium	2020-02-27	2020-05-17	80	20850.58	1225.85
Tebabs	122.37	118.03	Mid blooming	2020-01-01	2020-02-21	51	25.5	6.1563	Medium	2020-02-27	2020-05-16	79	20523.44	1256.91
Teffah	123	116.55	Mid blooming	2020-01-01	2020-02-21	51	25.5	6.1563	Medium	2020-02-28	2020-05-15	77	20092.13	1276.5
Tempranillo de Yeste-274	123.6	114.56	Mid blooming	2020-01-02	2020-02-19	48	23.83	6.04704	Medium	2020-02-21	2020-05-15	84	21256.44	1251.31
Toffahi-486	118.18	112.68	Early blooming	NA	NA	NA	NA	NA	NA	NA	NA	NA	NA	NA
Toffahi-621	123.12	117.37	Mid blooming	2020-01-02	2020-02-20	49	24.33	6.47045	Medium	2020-02-26	2020-05-17	81	21021.21	1219.87
Tonda Iblea	118.4	115.8	Early blooming	2019-12-31	2020-02-18	49	23.83	6.17792	Medium	2020-02-21	2020-05-18	87	22192.18	1207.71
Tounsi-461	127.66	117.46	Extra Late blooming blooming	NA	NA	NA	NA	NA	NA	NA	NA	NA	NA	NA
Trillo	121.42	115.65	Mid blooming	2019-12-24	2020-02-20	58	28	6.63325	Medium	2020-02-26	2020-05-18	82	21358.19	1226.56
Unkown-OT2-537	116.11	115.69	Early blooming	NA	NA	NA	NA	NA	NA	NA	NA	NA	NA	NA
Unkown-OZ1-538	122.68	117.01	Mid blooming	2019-12-26	2020-02-21	57	27.67	6.37704	Medium	2020-02-27	2020-05-15	78	20251.82	1274.89
Unkown-VS1-544	121.25	116.62	Mid blooming	2019-12-29	2020-02-21	54	26.5	6.1563	Medium	2020-02-27	2020-05-15	78	20251.82	1274.89
Unkown-VS2-545	120.32	114.45	Early blooming	2019-12-30	2020-02-20	52	25.33	6.15359	Medium	2020-02-26	2020-05-12	76	19640.45	1309.38
Unkown-VS5-547	120.54	117.1	Early blooming	2019-12-31	2020-02-21	52	25.5	6.1563	Medium	2020-02-27	2020-05-13	76	19733.47	1303.37
Uovo di Piccione	120.46	116.99	Early blooming	NA	NA	NA	NA	NA	NA	NA	NA	NA	NA	NA
Vaddarica	122.25	115.3	Mid blooming	2020-01-02	2020-01-27	25	12.67	3.26599	Low	2020-02-20	2020-05-18	88	22312.67	1176.13
Varudo	123.85	115.6	Mid blooming	NA	NA	NA	NA	NA	NA	NA	NA	NA	NA	NA
Varudo-275	115.92	113.8	Early blooming	NA	NA	NA	NA	NA	NA	NA	NA	NA	NA	NA
Vasilikada	122.33	114.58	Mid blooming	2020-01-01	2020-02-18	48	23.83	6.17792	Medium	2020-02-20	2020-05-13	83	20858.58	1251.96
Velika Lastovka	122.5	116.79	Mid blooming	2019-12-30	2020-02-20	52	25.33	6.15359	Medium	2020-02-27	2020-05-14	77	19992.00	1293.97
Vera	117.44	113.91	Early blooming	NA	NA	NA	NA	NA	NA	NA	NA	NA	NA	NA
Verdala	121.72	114.89	Mid blooming	2020-01-04	2020-02-18	45	23	6	Medium	2020-02-20	2020-05-12	82	20594.93	1268.7
Verdale	119.61	113.77	Early blooming	2020-01-01	2020-02-18	48	23.83	6.17792	Medium	2020-02-20	2020-05-12	82	20594.93	1268.7
Verdial de Badajoz	119.45	113.46	Early blooming	2020-01-01	2020-02-18	48	23.83	6.17792	Medium	2020-02-20	2020-05-12	82	20594.93	1268.7
Verdial de Huévar	124.31	116.33	Late blooming	2019-12-31	2020-02-18	49	23.83	6.17792	Medium	2020-02-21	2020-05-16	85	21528.06	1231.77
Verdial transmontana	123.85	115.46	Mid blooming	2020-01-05	2020-01-25	20	10.83	3.0605	Low	2020-02-20	2020-05-12	82	20594.93	1268.7
Verdiell	127	116.34	Extra Late blooming blooming	NA	NA	NA	NA	NA	NA	NA	NA	NA	NA	NA
Villalonga	122.13	114.76	Mid blooming	2020-01-03	2020-01-27	24	12.5	3.08221	Low	2020-02-20	2020-05-12	82	20594.93	1268.7
Wateken	123.33	115.93	Mid blooming	NA	NA	NA	NA	NA	NA	NA	NA	NA	NA	NA
Zael Al Muhra	122.82	117.94	Mid blooming	2019-12-30	2020-02-21	53	26	5.93296	Medium	2020-02-27	2020-05-16	79	20523.44	1256.91
Zaity	123.81	116.36	Mid blooming	2020-01-01	2020-02-21	51	25.5	6.1563	Medium	2020-02-29	2020-05-13	74	19408.90	1286.69
Zalmati-299	122.62	115.6	Mid blooming	2019-11-05	2020-01-27	83	31.83	7.41395	High	2020-02-20	2020-05-13	83	20858.58	1251.96
Zarza	117.41	114.65	Early blooming	2019-12-29	2020-02-18	51	24.83	6.17792	Medium	2020-02-21	2020-05-16	85	21528.06	1231.77
Zeboudj boudoudane	124.2	119.22	Late blooming	2020-01-02	2020-02-21	50	25	6.22896	Medium	2020-02-27	2020-05-15	78	20251.82	1274.89
Zeletni	123.5	116.23	Mid blooming	2019-11-04	2020-01-24	81	30.5	7.39594	High	2020-02-19	2020-05-13	84	20979.82	1220.06
